# Acoustic regularities in infant-directed speech and song across cultures

Courtney B. Hilton<sup>1,^,\*</sup>, Cody J. Moser<sup>1,2,^,\*</sup>, Mila Bertolo<sup>1</sup>, Harry Lee-Rubin<sup>1</sup>, Dorsa Amir<sup>3</sup>, Constance M. Bainbridge<sup>1,4</sup>, Jan Simson<sup>1,5</sup>, Dean Knox<sup>6</sup>, Luke Glowacki<sup>7</sup>, Andrzej Galbarczyk<sup>8</sup>, Grazyna Jasienska<sup>8</sup>, Cody T. Ross<sup>9</sup>, Mary Beth Neff<sup>10,11</sup>, Alia Martin<sup>10</sup>, Laura K. Cirelli<sup>12,13</sup>, Sandra E. Trehub<sup>13</sup>, Jinqi Song<sup>14</sup>, Minju Kim<sup>15</sup>, Adena Schachner<sup>15</sup>, Tom A. Vardy<sup>16</sup>, Quentin D. Atkinson<sup>16,17</sup>, Jan Antfolk<sup>18</sup>, Purnima Madhivanan<sup>19,20,21,22</sup>, Anand Siddaiah<sup>22</sup>, Caitlyn D. Placek<sup>23</sup>, Gul Deniz Salali<sup>24</sup>, Sarai Keestra<sup>24</sup>, Manvir Singh<sup>25,26</sup>, Scott A. Collins<sup>27</sup>, John Q. Patton<sup>28</sup>, Camila Scaff<sup>29</sup>, Jonathan Stieglitz<sup>26,30</sup>, Cristina Moya<sup>31,32</sup>, Rohan R. Sagar<sup>33,34</sup>, Brian M. Wood<sup>35</sup>, Max M. Krasnow<sup>1,36</sup> & Samuel A. Mehr<sup>1,37,\*</sup>

<sup>1</sup>Department of Psychology, Harvard University, Cambridge, MA 02138, USA. <sup>2</sup>Department of Cognitive and Information Sciences, University of California Merced, Merced, CA 95343, USA. <sup>3</sup>Boston College Department of Psychology, Chestnut Hill, MA 02467, USA. <sup>4</sup>Department of Communication, University of California Los Angeles, Los Angeles, CA 90095, USA. <sup>5</sup>Department of Psychology, University of Amsterdam, 1012 WX Amsterdam, The Netherlands. <sup>6</sup>Department of Politics, Princeton University, Princeton, NJ 08544, USA. <sup>7</sup>Department of Anthropology, Boston University, Boston, MA 02215, USA. <sup>8</sup>Department of Environmental Health, Faculty of Health Sciences, Jagiellonian University Medical College, 31-066 Krakow, Poland. <sup>9</sup>Department of Human Behavior, Ecology and Culture, Max Planck Institute for Evolutionary Anthropology, 04103 Leipzig, Germany. <sup>10</sup>School of Psychology, Victoria University of Wellington, Wellington 6012, New Zealand. <sup>11</sup>Department of Philosophy, Classics, History of Art and Ideas, University of Oslo, Oslo 0315, Norway. <sup>12</sup>Department of Psychology, University of Toronto Scarborough, Toronto, Ontario M1C 1A4, Canada. <sup>13</sup>Department of Psychology, University of Toronto Mississauga, Mississauga, Ontario L5L 1C6, Canada. <sup>14</sup>Department of Mathematics, University of California Los Angeles, Los Angeles, CA 90095, USA. <sup>15</sup>Department of Psychology, University of California, San Diego, La Jolla, CA 92093-0109, USA. <sup>16</sup>School of Psychology, University of Auckland, Auckland 1010, New Zealand. <sup>17</sup>Department of Linguistic and Cultural Evolution, Max Planck Institute for the Science of Human History, D-07745 Jena, Germany. <sup>18</sup>Department of Psychology, Åbo Akademi, 20500 Turku, Finland. <sup>19</sup>Department of Health Promotion Sciences, College of Public Health, University of Arizona, Tucson, AZ 85724, USA. <sup>20</sup>Department of Medicine, Division of Infectious Diseases, College of Medicine, University of Arizona, Tucson, AZ 85724, USA. <sup>21</sup>Department of Family & Community Medicine, College of Medicine, University of Arizona, Tucson, AZ 85724, USA. <sup>22</sup>Public Health Research Institute of India, Mysuru 570020, India. <sup>23</sup>Department of Anthropology, Ball State University, Muncie, IN 47306, USA. <sup>24</sup>Department of Anthropology, University College London, WC1H 0BW London, UK. <sup>25</sup>Department of Human Evolutionary Biology, Harvard University, Cambridge, MA 02138, USA. <sup>26</sup>Institute for Advanced Study in Toulouse, 31080 Toulouse Cedex 6, France. <sup>27</sup>School of Human Evolution and Social Change, Arizona State University, Tempe, AZ 85281, USA. <sup>28</sup>Division of Anthropology, California State University, Fullerton, CA 92831, USA. <sup>29</sup>Institute of Evolutionary Medicine, University of Zurich, 8006 Zurich, Switzerland. <sup>30</sup>Université Toulouse 1 Capitole, 31080 Toulouse Cedex 6, France. <sup>31</sup>Department of Anthropology, University of California, Davis, Davis, CA 95616, USA. <sup>32</sup>Centre for Culture & Evolution, Brunel University London, UB8 3PH Uxbridge, UK. <sup>33</sup>Future Generations University, Circle Ville, WV 26807, USA. <sup>34</sup>Harpy Eagle Music Foundation, Georgetown, Guyana. <sup>35</sup>Department of Anthropology, University of California, Los Angeles, Los Angeles, CA 90095, USA. <sup>36</sup>Division of Continuing Education, Harvard University, Cambridge, MA 02138, USA. <sup>37</sup>Data Science Initiative, Harvard University, Cambridge, MA 02138, USA.

<sup>^</sup>These authors contributed equally and are listed alphabetically.

\*Corresponding author. E-mails: [courtneyhilton@g.harvard.edu](mailto:courtneyhilton@g.harvard.edu) (C.B.H.), [cmoser2@ucmerced.edu](mailto:cmoser2@ucmerced.edu) (C.J.M.), [sam@wjh.harvard.edu](mailto:sam@wjh.harvard.edu) (S.A.M.)

## Abstract

The forms of many species' vocal signals are shaped by their functions<sup>1-15</sup>. In humans, a salient context of vocal signaling is infant care, as human infants are altricial<sup>16,17</sup>. Humans often alter their vocalizations to produce "parentese", speech and song produced for infants that differ acoustically from ordinary speech and song<sup>18-35</sup> in fashions that have been proposed to support parent-infant communication and infant language learning<sup>36-39</sup>; modulate infant affect<sup>33,40-45</sup>; and/or coordinate communicative interactions with infants<sup>46-48</sup>. These theories predict a form-function link in infant-directed vocalizations, with consistent acoustic differences between infant-directed and adult-directed vocalizations across cultures. Some evidence supports this prediction<sup>23,27,28,32,49-52</sup>, but the limited generalizability of individual ethnographic reports and laboratory experiments<sup>53</sup> and small stimulus sets<sup>54</sup>, along with intriguing reports of counterexamples<sup>55-62</sup>, leave the question open. Here, we show that people alter the acoustic forms of their vocalizations in a consistent fashion across cultures when speaking or singing to infants. We collected 1,615 recordings of infant- and adult-directed singing and speech produced by 410 people living in 21 urban, rural, and small-scale societies. First, we analyzed their acoustic forms. We found cross-culturally robust regularities in the acoustics of infant-directed vocalizations, such that infant-directed speech and song were reliably classified from acoustic features found across the 21 societies studied. The acoustic profiles of infant-directedness differed across language and music, but in a consistent fashion worldwide. Then, we studied whether listeners are sensitive to these acoustic features, playing the recordings to 49,241 people recruited online, from many countries, who guessed whether each vocalization was infant-directed. Their intuitions were largely accurate, predictable in part by acoustic features of the recordings, and robust to the effects of linguistic relatedness between vocalizer and listener. By uniting rich cross-cultural data with computational methods, we show links between the production of vocalizations and cross-species principles of bioacoustics, informing hypotheses of the psychological functions and evolution of human communication.

# 1 Main

2 The forms of many animal signals are shaped by their functions, a link arising from production- and reception-  
3 related rules that help to maintain reliable signal detection within and across species<sup>1-6</sup>. Form-function  
4 links are widespread in vocal signals across taxa, from meerkats to fish<sup>3,7-10</sup>, causing acoustic regularities  
5 that allow cross-species intelligibility<sup>11-13,15</sup>. This facilitates the ability of some species to eavesdrop on the  
6 vocalizations of other species, for example, as in superb fairywrens (*Malurus cyaneus*), who learn to flee  
7 predatory birds in response to alarm calls that they themselves do not produce<sup>14</sup>.

8 In humans, an important context for the effective transmission of vocal signals is between parents and infants,  
9 as human infants are particularly helpless<sup>16</sup>. To elicit care, infants use a distinctive alarm signal: they cry<sup>17</sup>.  
10 In response, adults produce infant-directed language and music (sometimes called “parentese”) in forms of  
11 speech and song with putatively stereotyped acoustics<sup>18-35</sup>.

12 These stereotyped acoustics are thought to be functional: supporting language acquisition<sup>36-39</sup>, modulating  
13 infant affect and temperament<sup>33,40,41</sup>, and/or coordinating communicative interactions with infants<sup>46-48</sup>.  
14 These theories all share a key prediction: like the vocal signals of other species, the forms of infant-directed  
15 vocalizations should be shaped by their functions, instantiated with clear regularities across cultures. Put  
16 another way, we should expect people to *alter* the acoustics of their vocalizations when those vocalizations  
17 are directed toward infants, and they should make those alterations in similar fashions worldwide.

18 The evidentiary basis for such a claim is controversial, however, given the limited generalizability  
19 of individual ethnographic reports and laboratory studies<sup>53</sup>; small stimulus sets<sup>54</sup>; and a variety of  
20 counterexamples<sup>55,56,58-62</sup>. Some evidence suggests that infant-directed speech is primarily characterized  
21 by higher and more variable pitch<sup>63</sup> and more exaggerated and variable vowels<sup>23,64,65</sup>, based on studies in  
22 modern industrialized societies<sup>23,28,49,50,52,66,67</sup> and a few small-scale societies<sup>51,68</sup>. Infants are themselves  
23 sensitive to these features, preferring them, even if spoken in unfamiliar languages<sup>69-71</sup>. But these acoustic  
24 features are less exaggerated or reportedly absent in some cultures<sup>60,66,72</sup> and may vary in relation to the age  
25 and sex of the infant<sup>66,73,74</sup>, weighing against claims of cross-cultural regularities.

26 In music, infant-directed songs also seem to have some stereotyped acoustic features. Lullabies, for example,  
27 tend toward slower tempos, reduced accentuation, and simple repetitive melodic patterns<sup>31,32,35,75</sup>, supporting  
28 functional roles associated with infant care<sup>33,41,46</sup> in industrialized<sup>34,76-78</sup> and small-scale societies<sup>79,80</sup>. Infants  
29 are soothed by these acoustic features, whether produced in familiar<sup>44,45</sup> or unfamiliar songs<sup>81</sup>, and both  
30 adults and children reliably associate the same features with a soothing function<sup>31,32,75</sup>. But cross-cultural  
31 studies of infant-directed song have primarily relied upon archival recordings from disparate sources<sup>29,31,32</sup>;  
32 an approach that poorly controls for differences in voices, behavioral contexts, recording equipment, and  
33 historical conventions, limiting the precision of findings and complicating their generality.

34 Measurements of the *same voices* producing multiple vocalizations, gathered from many people in many  
35 languages, worldwide, would enable the clearest analyses of whether and how humans alter the acoustics  
36 of their vocalizations when communicating with infants, helping to address the lack of consensus in the  
37 literature. Further, yoked analyses of both speech and song may explain how the forms of infant-directed  
38 vocalizations reliably differ from one another, testing theories of their shared or separate functions<sup>33,36-41,46</sup>.

39 We take this approach here. We built a corpus of infant-directed speech, adult-directed speech, infant-directed  
40 song, and adult-directed song from 21 human societies, totaling 1615 recordings of 410 voices (Fig. 1a,  
41 Table 1, and Methods; the corpus is open-access at <https://doi.org/10.5281/zenodo.5525161>). We aimed  
42 to maximize linguistic, cultural, geographic, and technological diversity: the recordings cover 18 languages  
43 from 11 language families and represent societies located on 6 continents, with varying degrees of isolation  
44 from global media, including 4 small-scale societies that lack access to television, radio, or the internet and  
45 therefore have strongly limited exposure to language and music from other societies. Participants were asked  
46 to provide all four vocalization types.

47 We used computational analyses of the acoustic forms of the vocalizations and a citizen-science experiment to  
48 test (i) the degree to which infant-directed vocalizations are cross-culturally stereotyped; and (ii) the degree  
49 to which naïve listeners detect infant-directedness in language and music.

| Region                     | Sub-Region         | Society            | Language              | Language family          | Subsistence type   | Population | Distance to city (km) | Children per family | Recordings |
|----------------------------|--------------------|--------------------|-----------------------|--------------------------|--------------------|------------|-----------------------|---------------------|------------|
| Africa                     | Central Africa     | Mbendjéle BaYaka   | Mbendjéle             | Niger-Congo              | Hunter-Gatherer    | 61-152     | 120                   | 7                   | 60         |
|                            | Eastern Africa     | Hadza              | Hadza                 | Hadza                    | Hunter-Gatherer    | 35         | 80                    | 6                   | 38         |
| Asia                       |                    | Nyangatom          | Nyangatom             | Nilotic                  | Pastoralist        | 155        | 180                   | 5.6                 | 56         |
|                            |                    | Toposa             | Toposa                | Nilotic                  | Pastoralist        | 250        | 180                   | 5.2                 | 60         |
|                            | East Asia          | Beijing            | Mandarin              | Sino-Tibetan             | Urban              | 21.5M      | 0                     | 1                   | 124        |
|                            | South Asia         | Jenu Kurubas       | Kannada               | Dravidian                | Other              | 2000       | 15                    | 1                   | 80         |
|                            | Southeast Asia     | Mentawai Islanders | Mentawai              | Austronesian             | Horticulturalist   | 260        | 120                   | Unknown             | 60         |
| Europe                     | Eastern Europe     | Krakow             | Polish                | Indo-European            | Urban              | 771,069    | 0                     | 1.54                | 44         |
|                            | Scandinavia        | Rural Poland       | Polish                | Indo-European            | Agriculturalists   | 6,720      | 70                    | 1.83                | 55         |
|                            |                    | Turku              | Finnish & Swedish     | Uralic and Indo-European | Urban              | 186,000    | 0                     | 1.41                | 80         |
| North America              | North America      | San Diego          | English (USA)         | Indo-European            | Urban              | 3.3M       | 0                     | 1.7                 | 116        |
|                            |                    | Toronto            | English (Canadian)    | Indo-European            | Urban              | 5.9M       | 0                     | 1.5                 | 198        |
| Oceania                    | Melanesia          | Ni-Vanuatu         | Bislama               | Indo-European Creole     | Horticulturalist   | 6,000      | 224                   | 3.78                | 90         |
|                            | Polynesia          | Enga               | Enga                  | Trans-New Guinea         | Horticulturalist   | 500        | 120                   | 6                   | 22         |
|                            |                    | Wellington         | English (New Zealand) | Indo-European            | Urban              | 210,400    | 0                     | 1.45                | 228        |
| South America              | Amazonia           | Arawak             | English Creole        | Indo-European            | Other              | 350        | 32                    | 3                   | 48         |
|                            | Central Andes      | Tsimane            | Tsimane               | Moseten-Tsimane          | Horticulturalist   | 150        | 234                   | 9                   | 51         |
|                            |                    | Sapara & Achuar    | Quechua & Achuar      | Quechuan & Jivaroan      | Horticulturalist   | 200        | 205                   | 9                   | 59         |
|                            |                    | Quechua/Aymara     | Spanish               | Indo-European            | Agro-Pastoralist   | 200        | 8                     | 4                   | 49         |
| Northwestern South America | Afrocolombians     |                    | Spanish               | Indo-European            | Horticulturalist   | 300-1,000  | 100                   | 6.6                 | 53         |
|                            | Colombian Mestizos |                    | Spanish               | Indo-European            | Commercial Economy | 470,000    | 0                     | 3.5                 | 43         |

**Table 1.** Societies from which recordings were gathered.

## 50 **The acoustic forms of infant-directed speech and song are stereotyped across** 51 **cultures**

52 We studied 15 types of acoustic features in each recording (e.g., pitch, rhythm, timbre) via 94 summary  
53 variables (e.g., median, interquartile range) that were treated to reduce the influence of atypical observations  
54 (e.g., extreme values caused by loud wind, rain, and other background noises) (see Methods and SI Text 1.1;  
55 a codebook is in Extended Data Table 1). To minimize the potential for bias, we collected the acoustic data  
56 using automated signal extraction tools that measure physical characteristics of the auditory signal; such  
57 physical characteristics lack cultural information (in contrast to, e.g., human annotations) and thus can be  
58 applied reliably across diverse audio recordings.

59 First, we asked whether the acoustics of infant-directed speech and song are stereotyped in similar ways across  
60 the societies whose recordings we studied. Following previous work<sup>32</sup>, we used a least absolute shrinkage  
61 and selection operator (LASSO) logistic classifier<sup>82</sup> with field-site-wise  $k$ -fold cross-validation, separately for  
62 speech and song recordings, using all 15 types of acoustic features (see Methods). This approach provides  
63 a strong test of cross-cultural regularity: the model is trained *only* on data from 20 of the 21 societies to  
64 predict whether each vocalization in the 21st society is infant- or adult-directed. The procedure is repeated 20  
65 further times, with each society being held out, optimizing the model to maximize classification performance  
66 across the full set of societies. The summary of the model's performance reflects, corpus-wide, the degree to  
67 which infant-directed speech and song are acoustically stereotyped, as high classification performance can  
68 only result from cross-cultural regularities.

69 The models accurately classified both speech and song, on average (Fig. 1b; speech: area under the curve,  
70 AUC = 92%, 95% CI [87%, 97%]; song: AUC = 78% correct, 95% CI [71%, 86%]). Evaluating classification  
71 performance within the recordings in each field-site showed a high degree of cross-cultural regularity, with the  
72 average performance in 21 of 21 field-sites' speech recordings and 20 of 21 field-sites' song recordings above  
73 chance level (Fig. 1b).

74 To test the reliability of these findings, we repeated them with two alternate cross-validation strategies, using  
75 the same cross-validation procedure but doing so across language families and geographic regions instead of  
76 field-sites. The results robustly replicated in both cases (Extended Data Fig. 1). Moreover, to ensure that the  
77 main LASSO results were not attributable to particulars of the audio-editing process (see Methods), we also  
78 repeated them using unedited audio from the corpus; the results replicated again (Extended Data Fig. 2).

79 What acoustic features characterize infant-directedness in speech and song? We tested this question with  
80 two convergent approaches. First, the LASSO procedure identified the most reliable predictors of contrasts  
81 between infant- and adult-directed vocalizations. The most influential of these predictors are in Fig. 1b, with  
82 their relative variable importance scores, and show substantial differences in the variables the model relied  
83 upon to reliably classify speech and song across cultures. For example, pitch ( $F_0$  median and interquartile  
84 range) and median vowel travel rate strongly differentiated infant-directedness in speech, but not in song; while  
85 vowel travel variability (interquartile range) and median intensity strongly differentiated infant-directedness  
86 in song, but not in speech. The full results of the LASSO variable selection are in Extended Data Table 2.

87 In a separate exploratory-confirmatory analysis, we used mixed-effects regression to measure the expected  
88 difference in each acoustic feature associated with infant-directedness, separately for speech and song.  
89 Importantly, this approach estimates main effects adjusted for sampling variability *and* estimates field-site-  
90 level effects, allowing for tests of the degree to which the main effects differ in magnitude across cultures  
91 (e.g., for a given acoustic feature, if recordings from some field-sites show larger differences between infant-  
92 and adult-directed speech than do recordings from other field-sites).

93 The procedure identified 11 acoustic features that reliably distinguished infant-directedness in song, speech,  
94 or both (Fig. 2; statistics are in Extended Data Table 3); we also estimated these effects within each field-site  
95 (see the doughnut plots in Fig. 2 and full estimates in Extended Data Table 4).

96 In speech, across all or the majority of societies, infant-directedness was characterized by higher pitch, greater  
97 pitch range, and more contrasting vowels than adult-directed speech from the same voices (largely replicating  
98 the results of the LASSO approach; Fig. 1b and Extended Data Table 2). Several acoustic effects were

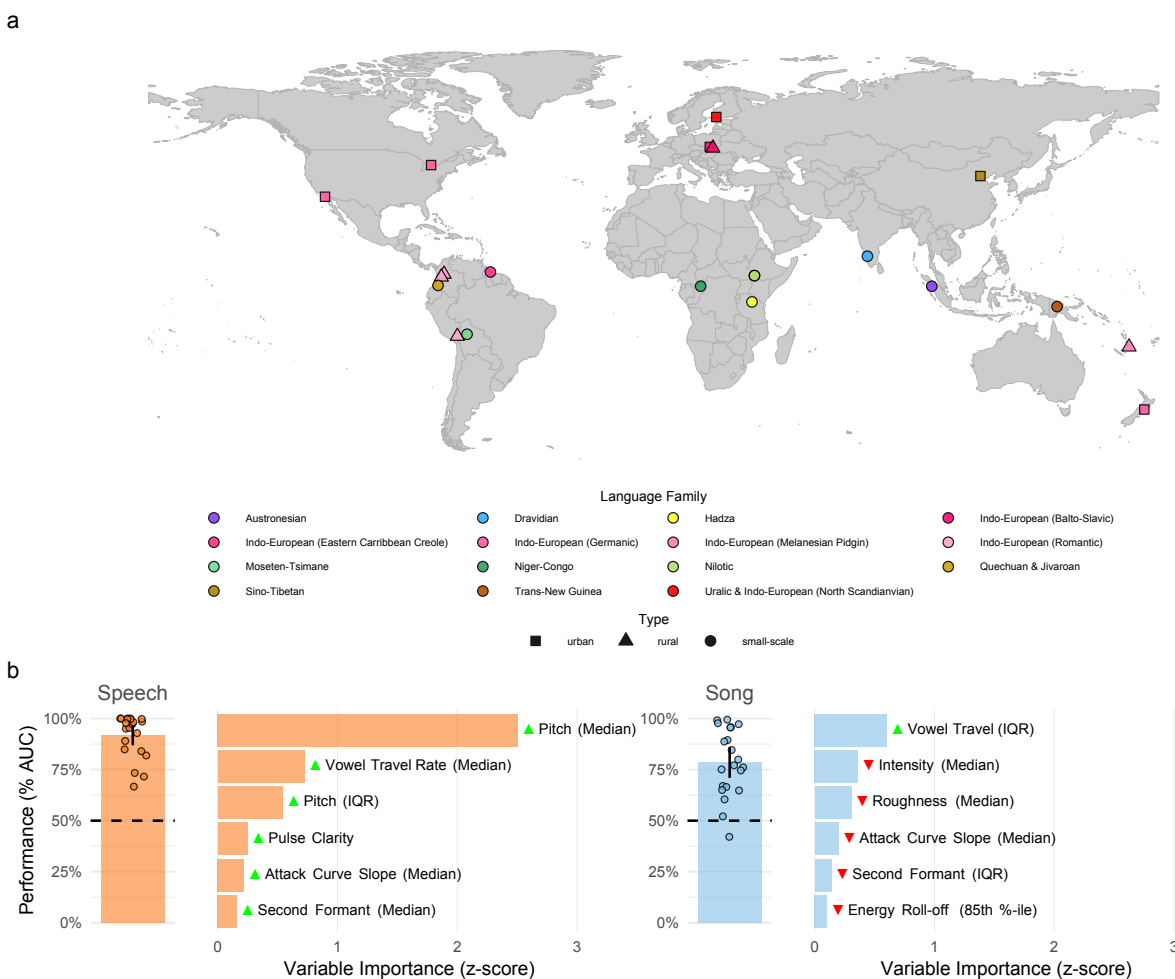

**Fig. 1 | Cross-cultural regularities in infant-directed vocalizations.** **a**, We recorded examples of speech and song from 21 urban, rural, or small-scale societies, in many languages. The map indicates the approximate locations of each society and is color-coded by the language family or sub-group represented by the society. **b**, Machine-learning classification demonstrates the stereotyped acoustics of infant-directed speech and song. We trained two least absolute shrinkage and selection operator (LASSO) models, one for speech and one for song, to classify whether recordings were infant-directed or adult-directed on the basis of their acoustic features. These predictors were regularized using fieldsite-wise cross-validation, such that the model optimally classified infant-directedness across all 21 societies studied. The vertical bars represent the overall classification performance (quantified via receiver operating characteristic/area under the curve; AUC); the error bars represent 95% confidence intervals; the points represent the performance estimate for each fieldsite; and the horizontal dashed lines indicate chance level of 50% AUC. The horizontal bars show the six acoustic features with the largest influence in each classifier; the green and red triangles indicate the direction of the effect, e.g., with median pitch having a large, positive effect on classification of infant-directed speech. The full results of the variable selection procedure are in Extended Data Table 2, with further details in Methods.

99 consistent in all fieldsites (e.g., pitch, energy roll-off, pulse clarity), while other features, such as vowel  
100 contrasts and inharmonicity were consistent in the majority of them. These patterns align with prior claims  
101 of pitch and vowel-contrast being robust features of infant-directed speech<sup>23,67</sup>, and substantiate them across  
102 many cultures.

103 The distinguishing features of infant-directed song were more subtle than those of speech but nevertheless  
104 corroborate its purported soothing functions<sup>33,41,46</sup>: reduced intensity and acoustic roughness, although these  
105 were less consistent across fieldsites than the speech results. The less-consistent effects may result from the  
106 fact that while solo-voice speaking is fairly natural and representative of most adult-directed speech (i.e.,  
107 people rarely speak at the same time), much of the world’s song occurs in social groups where there are  
108 multiple singers and accompanying instruments<sup>32,46,83</sup>. Asking participants to produce solo adult-directed  
109 song may have biased participants toward choosing more soothing and intimate songs (e.g., ballads, love  
110 songs; see Extended Data Table 5) or less naturalistic renditions of songs; and the production of songs in the  
111 presence of an infant, which could potentially alter participants’ singing style<sup>35</sup>. Thus, the distinctiveness of  
112 infant-directed song (relative to adult-directed song) may be underestimated here.

113 The exploratory-confirmatory analyses provided convergent evidence for opposing acoustic trends across  
114 infant-directed speech and song, as did an alternate approach using principal-components analysis; three  
115 principal components most strongly distinguished speech from song, infant-directed song from adult-directed  
116 song, and infant-directed speech from adult-directed speech (SI Text 1.2 and Extended Data Fig. 3).  
117 Replicating the LASSO findings, for example, median pitch strongly differentiated infant-directed speech  
118 from adult-directed speech, but it had no such effect in music; pitch variability had the *opposite* effect across  
119 language and music; and further differences were evident in pulse clarity, inharmonicity, and energy roll-off.  
120 These patterns are consistent with the possibility of differentiated functional roles across infant-directed  
121 speech and song<sup>18,33,34,45,46,81,84</sup>.

122 Some acoustic features were nevertheless common to both language and music; in particular, overall, infant-  
123 directedness was characterized by reduced roughness, which may facilitate parent-infant signalling<sup>5,41</sup> through  
124 better contrast with the sounds of screaming and crying<sup>17,85</sup>; and increased vowel contrasts, potentially to  
125 aid language acquisition<sup>36,37,39</sup> or as a byproduct of socio-emotional signalling<sup>1,65</sup>.

## 126 **Naïve listeners are sensitive to the acoustic forms of infant-directed vocalizations**

127 If people worldwide reliably alter their speech and song when interacting with infants, as the above findings  
128 suggest, this may enable listeners to make reliable inferences concerning the intended targets of speech and  
129 song, consistent with functional accounts of infant-directed vocalization<sup>33,36–43,46</sup>. We tested this hypothesis  
130 in a simple listening experiment.

131 We played excerpts from the vocalization corpus to 49,241 people in the “Who’s Listening?” game on  
132 <https://themusiclab.org> (after exclusions; see Methods). The participants resided in 186 countries (Fig. 3b)  
133 and reported speaking 196 languages fluently (including second languages in bilinguals). We asked them to  
134 judge, quickly, whether each vocalization was directed to a baby or to an adult (see Methods and Extended  
135 Data Fig. 4). Listeners’ responses were strongly biased toward “baby” responses when hearing songs and away  
136 from “baby” responses when hearing speech, regardless of the actual target of the vocalizations (Extended  
137 Data Fig. 5). As such, we used *d*-prime analyses at the level of each vocalist, i.e., analyzing listeners’  
138 sensitivity to infant-directedness in speech and song, correcting for response biases. Unless noted otherwise,  
139 all estimates reported here are generated by mixed-effects linear regression, adjusting for fieldsite nested  
140 within world region, via random effects.

141 Listeners’ intuitions were accurate, on average and across fieldsites (Fig. 3a). Sensitivity (*d'*) was significantly  
142 higher than the chance level of 0 (speech:  $d' = 1.19$ , 95% CI [0.55, 1.83]; song:  $d' = 0.51$ , 95% CI [0.18, 0.83];  
143  $ps < .05$ ). These results were robust to learning effects (Extended Data Fig. 6) and to multiple data trimming  
144 decisions. For example, they replicated whether or not recordings with confounding contextual/background  
145 cues (e.g., an audible infant) were excluded and also when data from English-language recordings, which  
146 might be understandable to participants, were excluded (SI Text 1.3).

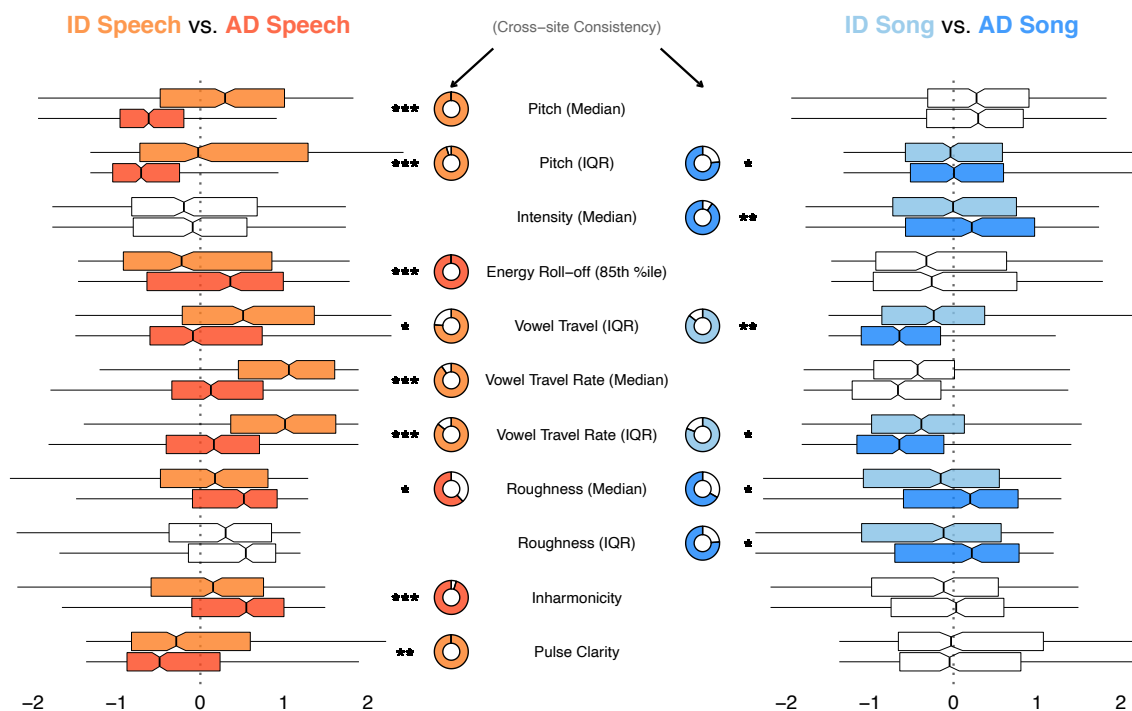

**Fig. 2 | How people alter their voices when vocalizing to infants.** Eleven acoustic features had a statistically significant difference between infant-directed and adult-directed vocalizations, within-voices, in speech, song, or both. Consistent with the LASSO results (Fig. 1b and Extended Data Table 2), the acoustic features operated differently across speech and song. For example, median pitch was far higher in infant-directed speech than in adult-directed speech, whereas median pitch was comparable across both forms of song. Some features were highly consistent across fieldsites (e.g., lower inharmonicity in infant-directed speech than adult-directed speech), whereas others were more variable (e.g., lower roughness in infant-directed speech than adult-directed speech). The boxplots, which are ordered approximately from largest differences between speech and song to smallest, represent each acoustic feature's median (vertical black lines) and interquartile range (boxes); the whiskers indicate  $1.5 \times \text{IQR}$ ; the notches represent the 95% confidence intervals of the medians; and the doughnut plots represent the proportion of fieldsites where the main effect repeated, based on estimates of fieldsite-wise random effects. Only comparisons that survived an exploratory-confirmatory analysis procedure are plotted; faded comparisons did not reach significance in confirmatory analyses. Significance values are computed via linear combinations, following multi-level mixed-effects models;  $*p < 0.05$ ,  $**p < 0.01$ ,  $***p < 0.001$ . Regression results are in Extended Data Table 3 and full reporting of fieldsite-level estimates is in Extended Data Table 4. Note: the model estimates are normalized jointly on speech and song data so as to enable comparisons *across* speech and song for each feature; as such, the absolute distance from 0 for a given feature is not directly interpretable, but estimates are directly comparable across speech and song.

147 To test the consistency of listener inferences across cultures, we estimated fieldsite-level sensitivity from  
148 the random effects in the model. Cross-site variability was evident in the magnitude of sensitivity effects:  
149 listeners were far better at detecting infant-directedness in some sites than others (with very high  $d'$  in the  
150 Wellington, New Zealand site for both speech and song, but marginal  $d'$  in Tannese Vanuatans, for example).  
151 Nevertheless, the estimated mean fieldsite-wise  $d'$  was greater than 0 in both speech and song in all fieldsites  
152 (Fig. 3a); with 95% confidence intervals not overlapping with 0 in 18 of 21 fieldsites for speech and 16 of  
153 20 for song (Extended Data Table 6; one  $d'$  estimate could not be computed for song due to missing data).  
154 Most fieldsite-wise sample sizes after exclusions were small (see Methods), so we caution that fieldsite-wise  
155 estimates are far less interpretable than the overall  $d'$  estimate reported above.

156 Analyses of cross-cultural variability among *listeners* revealed similarities in their perception of infant-  
157 directedness. In particular, the estimated random effects of listener country, gender, and age on sensitivity  
158 were all small (each varying by  $< 1\%$ ). And more detailed demographic characteristics available for a subset  
159 of participants in the United States, including socioeconomic status and ethnicity, explained little variance in  
160 sensitivity (SI Text 1.4). These findings suggest general cross-demographic consistency in listener intuitions.

161 However, one important aspect of listeners *was* predictive of their performance: their degree of relatedness  
162 to the vocalizer, on a given trial. To analyze this, we estimated fixed effects for three forms of linguistic  
163 relatedness between listener and vocalizer: (i) weak relatedness, when a language the listener spoke fluently  
164 was from a different language family than that of the vocalization (e.g., when the vocalization was in Mentawai,  
165 an Austronesian language, and the listener's native language was Mandarin, a Sino-Tibetan language); (ii)  
166 moderate relatedness, when the languages were from the same language family (e.g., when the vocalization  
167 was in Spanish and the listener spoke fluent English, which are both Indo-European languages); or (iii) strong  
168 relatedness, when a language the listener spoke fluently exactly matched the language of the vocalization.

169 Across all three relatedness types, sensitivity was significantly above chance (Fig. 3c;  $ps < 0.05$ ), with  
170 increases in performance associated with increasing relatedness (unrelated: estimated speech  $d' = 1.03$ , song  
171  $d' = 0.37$ ; same language family: speech  $d' = 1.30$ , song  $d' = 0.64$ ; same language: speech  $d' = 1.58$ , song  
172  $d' = 0.91$ ). This finding also provides a key control, demonstrating that the main effects (Fig. 3a) are not  
173 attributable to linguistic similarities between listeners and vocalizers, which could, for example, allow listeners  
174 to detect infant-directedness on the basis of non-acoustic features of the vocalizations.

175 We also found suggestive evidence of other, non-linguistic links between listeners and vocalizers being  
176 predictive of sensitivity. For example, fieldsite population size and distance to the nearest urban center were  
177 correlated estimated sensitivity to infant-directedness in that fieldsite. These and similar effects (reported in  
178 SI Text 1.5) suggests that performance was somewhat higher in the larger, more industrialized fieldsites that  
179 are more similar to the environments of internet users, on average. But these analyses are necessarily coarser  
180 than the linguistic relatedness tests reported above.

## 181 Human intuitions of infant-directedness are modulated by vocalization acoustics

182 Last, we studied the degree to which the acoustic features of the recordings were predictive of listeners'  
183 intuitions concerning them (measured as the experiment-wide *proportions* of infant-directedness ratings  
184 for each vocalization, in a similar approach to other research<sup>75</sup>). These proportions can be considered a  
185 continuous measure of perceived infant-directedness, per the ears of the naïve listeners. We trained two  
186 LASSO models to predict the proportions, with the same fieldsite-wise cross-validation procedure used in the  
187 acoustic analyses reported above. Both models explained variation in human listeners' intuitions, albeit more  
188 so in speech than in song (Fig. 4; speech  $R^2 = 0.59$ ; song  $R^2 = 0.19$ ,  $ps < 0.0001$ ).

189 If human inferences are attuned to cross-culturally reliable acoustic correlates of infant-directedness, one  
190 might expect a close relationship between the strength of *actual* acoustic differences between vocalizations  
191 on a given feature and the relative influence of that feature on human intuitions. To test this question, we  
192 correlated the ranking of acoustic features that distinguished infant-directed from adult-directed speech and  
193 song (Fig. 2; estimated as mean corpus-wide differences) with the ranking of acoustic features drawn from  
194 the LASSO model of human intuitions (the bar plots in Fig. 4). We found a significant positive relationship  
195 for speech ( $r = 0.75$ ,  $p = 0.02$ ) but not for song ( $r = 0.52$ ,  $p = 0.09$ ).



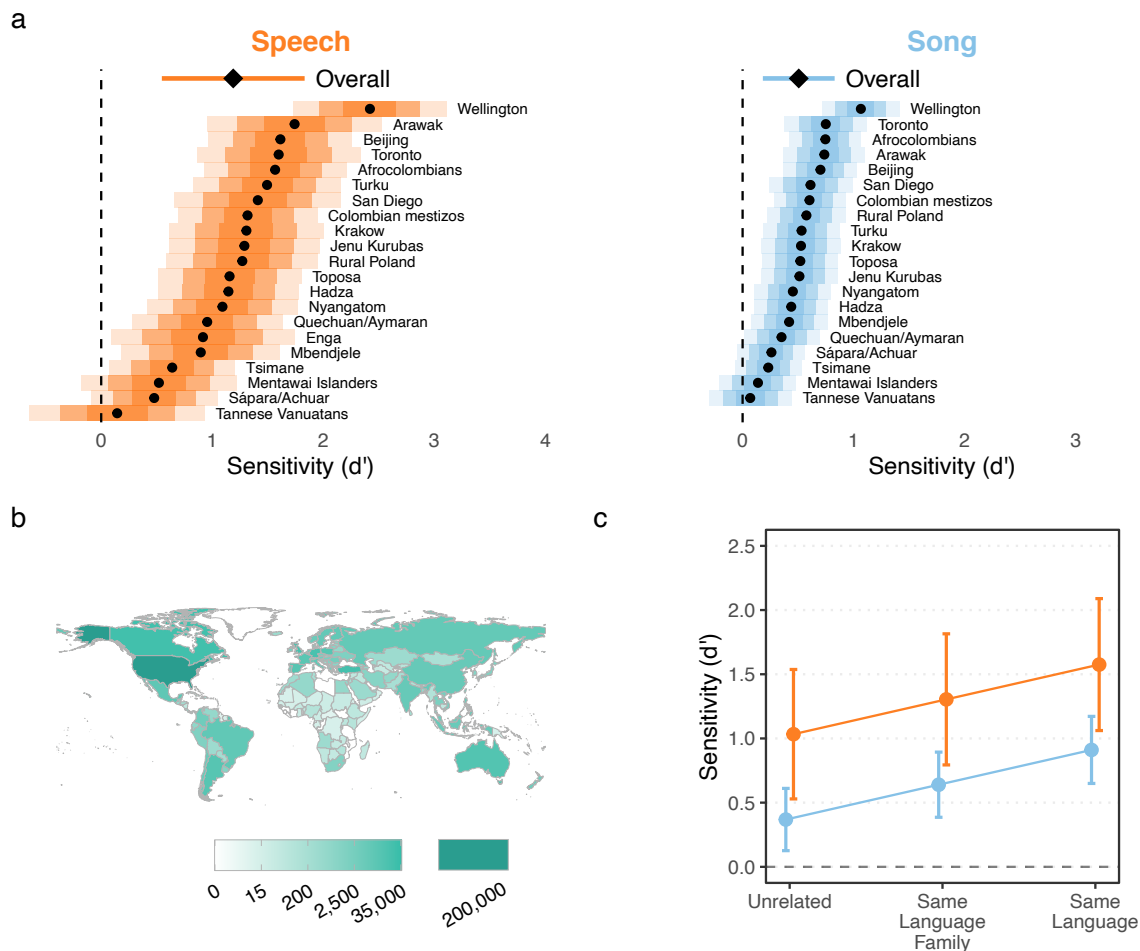

**Fig. 3 | Naïve listeners distinguish infant-directed vocalizations from adult-directed vocalizations across cultures.** Participants listened to vocalizations drawn at random from the corpus, viewing the prompt “Someone is speaking or singing. Who do you think they are singing or speaking to?” They could respond with either “adult” or “baby” (Extended Data Fig. 4). From these ratings, we computed listener sensitivity ( $d'$ ). **a**, Listeners reliably detected infant-directedness in both speech and song, overall (indicated by the diamonds, with 95% confidence intervals indicated by the horizontal lines), and across many fieldsites (indicated by the black dots), although the strength of the fieldsite-wise effects varied substantially (see the distance between the vertical dashed line and the black dots; the shaded regions represent 50%, 80%, and 95% confidence intervals, in increasing order of lightness). Note that one fieldsite-wise  $d'$  could not be estimated for song; complete statistical reporting is in Extended Data Table 6. **b**, The participants in the citizen-science experiment hailed from many countries; the gradients indicate the total number of vocalization ratings gathered from each country. **c**, The main effects held across different combinations of the linguistic backgrounds of vocalizer and listener. We split all trials from the main experiment into three groups: those where a language the listener spoke fluently was the same as the language of the vocalization ( $n = 82,094$ ); those where a language the listener spoke fluently was in the same major language family as the language of the vocalization ( $n = 110,664$ ), and those with neither type of relation ( $n = 285,378$ ). The plot shows the estimated marginal effects of a mixed-effects model predicting  $d'$  values across language and music examples, after adjusting for fieldsite-level effects. In all three cases, the main effects replicated; increases in linguistic relatedness corresponded with increases in sensitivity.

196 This difference helps to explain the weaker intuitions of the naïve listeners in song, relative to speech: naïve  
 197 listeners’ inferences about speech were more directly driven by acoustic features that *actually* characterize  
 198 infant-directed speech worldwide, whereas their inferences about song were erroneously driven by acoustic  
 199 features that *less reliably* characterize infant-directed song worldwide. For example, songs with higher  
 200 pulse clarity and median second formants, and lower median first formants were more likely to be rated as  
 201 infant-directed, but these features did not reliably correlate with infant-directed song across cultures in the  
 202 corpus (and, accordingly, neither approach to the acoustic analyses identified them as reliable correlates of  
 203 infant-directedness in music). Intuitions concerning infant-directed song may also have been driven by more  
 204 subjective features of the recordings, higher-level acoustic features that we did not measure, or both.

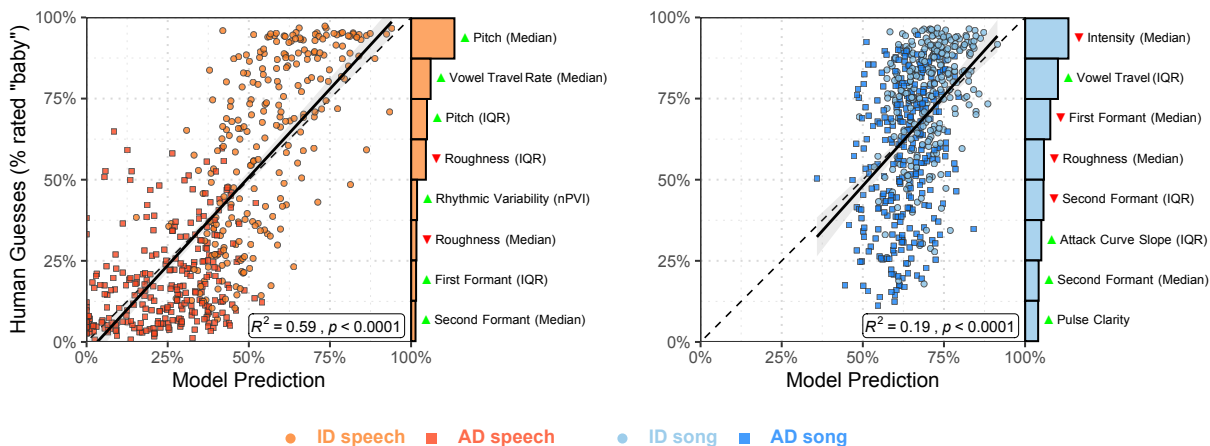

**Fig. 4 | Human inferences about infant-directedness are predictable from acoustic features of vocalizations.** To examine the degree to which human inferences were linked to the acoustic forms of the vocalizations, we trained two LASSO models to predict the *proportion* of “baby” responses for each recording from the human listeners. While both models explained substantial variability in human responses, the model for speech was more accurate than the model for song, in part because the human listeners erroneously relied on acoustic features for their predictions in song that less reliably characterized infant-directed song across cultures (see Figs. 1b and 2). Each point represents a recorded vocalization, plotted in terms of the model’s estimated infant-directedness of the model and the average “infant-directed” rating from the naïve listeners; the barplots depict the relative explanatory power of the top 8 acoustical features in each LASSO model, showing which features were most strongly associated with human inferences (the green or red triangles indicate the directions of effects, with green higher in infant-directed vocalizations and red lower); the dotted diagonal lines represent a hypothetical perfect match between model predictions and human guesses; the solid black lines depict linear regressions; and the grey ribbons represent the standard errors of the mean, from the regressions.

## 205 Discussion

206 We provide convergent evidence for cross-cultural regularities in the acoustic design of infant-directed speech  
 207 and song. Infant-directedness was robustly characterized by core sets of acoustic features, across the 21  
 208 societies studied, and these sets of features differed reliably across speech and song. Naïve listeners were  
 209 sensitive to the acoustical regularities, as they reliably identified infant-directed vocalizations as more infant-  
 210 directed than adult-directed vocalizations, despite the fact that the vocalizations were of largely unfamiliar  
 211 cultural, geographic, and linguistic origin.

212 Thus, despite evident variability in language, music, and infant care practices worldwide, when people speak

213 or sing to fussy infants, they modify the acoustic features of their vocalizations in similar and mutually  
214 intelligible ways across cultures. This evidence supports the hypothesis that the forms of infant-directed  
215 vocalizations are shaped by their functions, in a fashion similar to the vocal signals of many non-human  
216 species.

217 These findings do not mean that infant-directed speech and song always sound the same across cultures.  
218 Indeed, the classification accuracy of a machine-learning model varied, with some fieldsites demonstrating  
219 larger acoustic differences between infant- and adult-directed vocalizations than other fieldsites. Similarly, the  
220 citizen-science participants' ratings of infant-directedness differed substantially in magnitude across fieldsites.  
221 But such variability also does not imply the *absence* of cross-cultural regularities. Instead, they support  
222 an account of acoustic variation stemming from epigenetic rules: species-typical traits which bias cultural  
223 variation in one direction rather than another<sup>86</sup>. Put another way, the pattern of evidence strongly implies a  
224 core set of cross-cultural acoustic and perceptual regularities which are also shaped by culture.

225 By analyzing both speech and song recorded from the same voices, we discerned precise differences in the  
226 ways infant-directedness is instantiated in language and music. In response to the same prompt of addressing  
227 a “fussy infant”, infant-directedness in speech and song was instantiated with opposite trends in acoustic  
228 modification (relative to adult-directed speech and song, respectively): infant-directed speech was more  
229 intense and contrasting (e.g., more pitch variability, higher intensity) while infant-directed song was more  
230 subdued and soothing (e.g., less pitch variability, lower intensity). These acoustic dissociations comport  
231 with functional dissociations, with speech being more attention-grabbing, the better to distract from baby's  
232 fussiness<sup>37,38</sup>; and song being more soothing, the better to lower baby's arousal<sup>32,33,41–43,45,81</sup>. Speech and  
233 song are both capable of playful or soothing roles<sup>62</sup> but each here tended toward one acoustic profile over the  
234 other, despite both types of vocalization being elicited here in the *same* context: vocalizations used “when  
235 the baby is fussy”.

236 Many of the reported acoustic differences are consistent with properties of vocal signalling in non-human  
237 animals, raising the intriguing possibility that the designs of human communication systems are rooted in the  
238 basic principles of bioacoustics<sup>1–15</sup>. For example, in both speech and song, infant-directedness was robustly  
239 associated with purer and less harsh vocal timbres, and greater formant-frequency dispersion (expanded  
240 vowel space). And in speech, one of the largest and most cross-culturally robust effects of infant-directedness  
241 was higher pitch ( $F_0$ ). In non-human animals, these features have convergently evolved across taxa in the  
242 functional context of signalling friendliness or approachability in close contact calls<sup>1,3,65,87</sup>, in contrast to  
243 alarm calls or signals of aggression, which are associated with low-pitched, rough sounds with less formant  
244 dispersal<sup>4,88–90</sup>. The use of these features in infant care may originate from signalling approachability to  
245 baby, but may have later acquired further functions more specific to the human developmental context. For  
246 example, greater formant-frequency dispersion accentuates vowel contrasts, which could facilitate language  
247 acquisition<sup>36,65,91–93</sup>; and purer vocal timbre may facilitate communication by contrasting conspicuously  
248 with the acoustic context of infant cries<sup>5</sup> (for readers unfamiliar with infants, their cries are acoustically  
249 harsh<sup>17,85</sup>).

250 Such conspicuous contrasts may have the effect of altering speech to make it more song-like when interacting  
251 with infants, as Fernald<sup>18</sup> notes: “. . . the communicative force of [parental] vocalizations derive not from their  
252 arbitrary meanings in a linguistic code, but more from their immediate musical power to arouse and alert, to  
253 calm, and to delight”.

254 Comparisons of the acoustic effects across speech and song reported here support this idea. Infant-directedness  
255 altered the pitch level ( $F_0$ ) of speech, bringing it roughly to a level typical of song, while also increasing pulse  
256 clarity. These characteristics of music have been argued to originate from elaborations to infant-directed  
257 vocalizations, where both use less harsh but more variable pitch patterns, more temporally variable and  
258 expansive vowel spaces, and attention-orienting rhythmic cues to provide infants with ostensible “flashy”  
259 signals of attention and pro-social friendliness<sup>41,46,63,94,95</sup>. Pitch alterations are not *absent* from infant-  
260 directed song, of course; in one study, mothers sang a song at higher pitch when producing a more playful  
261 rendition, and a lower pitch when producing a more soothing rendition<sup>44</sup>. But on average, both infant- and  
262 adult-directed song, along with infant-directed speech, tend to be higher in pitch than adult-directed speech.  
263 In sum: the constellation of acoustic features that characterize infant-directedness in speech, across cultures,  
264 are rather musical.

265 We leave open at least two further questions. First, the results are suggestive of universality, because the  
266 corpus covers a swath of geographic locations (21 societies on 6 continents), languages (12 language families),  
267 and different subsistence regimes (8 types) (see Table 1). But the participants studied do not constitute a  
268 representative sample of humans (nor do the societies or languages studied constitute a representative sample  
269 of human societies or languages), so a strong claim of universality would not be justified.

270 Future work may expand on our approach by (i) using phylogenetic methods to examine whether people  
271 in societies that are distantly related nonetheless produce similar infant-directed vocalizations; (ii) testing  
272 perceived infant-directedness in more diverse samples of listeners, to more accurately characterize cross-  
273 cultural variability in the *perception* of infant-directedness; and (iii) testing listener intuitions among groups  
274 with reduced exposure to a given set of infant-directed vocalizations, such as very young infants or people  
275 from isolated, distantly related societies, as in related efforts<sup>27,69,96</sup>. Such research would benefit in particular  
276 from a focus on societies previously reported to have unusual vocalization practices, infant care practices,  
277 or both<sup>55,58–60</sup>; and would also clarify the extent to which convergent practices across cultures are due to  
278 cultural borrowing (in the many cases where societies are not fully isolated from the influence of global  
279 media).

280 Second, we note that speech and song are used in multiple contexts with infants, of which “addressing a fussy  
281 infant” is just one<sup>18,34</sup>. One curious finding may bear on general questions of the psychological functions  
282 of music: naïve listeners displayed a bias toward “adult” guesses for speech and “baby” guesses for song,  
283 regardless of their actual targets. This suggests that listeners treated “adult” and “baby” as the default  
284 reference levels for speech and song, respectively, against which acoustic evidence was compared, a pattern  
285 consistent with theories that posit song as having a special connection to infant care in human psychology<sup>33,46</sup>.

## 286 Methods

### 287 Vocalization corpus

288 We built a corpus of 1,615 recordings of infant-directed song, infant-directed speech, adult-directed song, and  
289 adult-directed speech (all audio is available at <https://doi.org/10.5281/zenodo.5525161>). Participants ( $N$   
290 = 411) living in 21 societies (Fig. 1a and Table 1) produced each of these vocalizations, respectively, with  
291 a median of 15 participants per society (range 6–57). From those participants for whom information was  
292 available, most were female (86%) and nearly all were parents or grandparents of the focal infant (95%).  
293 Audio for one or more examples was unavailable from a small minority of participants, in cases of equipment  
294 failure or when the participant declined to complete the full recording session (35 recordings, or 2.2% of the  
295 corpus, were missing).

296 Recordings were collected by principal investigators and/or staff at their field sites, all using the same data  
297 collection protocol. They translated instructions to the native language of the participants, following the  
298 standard research practices at each site. There was no procedure for screening out participants, but we  
299 encouraged our collaborators to collect data from parents rather than non-parents. Fieldsites were selected  
300 partly by convenience (i.e., via recruiting principal investigators at fieldsites with access to infants and  
301 caregivers) and partly to maximize cultural, linguistic, and geographic diversity (see Table 1).

302 For infant-directed song and infant-directed speech, participants were asked to sing and speak to their infant  
303 as if they were fussy, where “fussy” could refer to anything from frowning or mild whimpering to a full  
304 tantrum. At no fieldsites were difficulties reported in the translation of the English word “fussy”, suggesting  
305 that participants understood it. For adult-directed speech, participants spoke to the researcher about a topic  
306 of their choice (e.g., they described their daily routine). For adult-directed song, participants sang a song  
307 that was not intended for infants; they also stated what that song was intended for (e.g., “a celebration  
308 song”). Participants vocalized in the primary language of their fieldsite, with a few exceptions (e.g., when  
309 singing songs without words; or in locations that used multiple languages, such as Turku, which included  
310 both Finnish and Swedish speakers).

311 For most participants (90%) an infant was physically present during the recording (the infants were 48%  
312 female; age in months:  $M = 11.40$ ;  $SD = 7.61$ ; range 0.5-48). When an infant was not present, participants  
313 were asked to imagine that they were vocalizing to their own infant or grandchild, and simulated their  
314 infant-directed vocalizations (a brief discussion is in SI Text 1.6).

315 In all cases, participants were free to determine the content of their vocalizations. This was intentional:  
316 imposing a specific content category on their vocalizations (e.g., “sing a *lullaby*”) would likely alter the  
317 acoustic features of their vocalizations, which are known to be influenced by experimental contexts<sup>97</sup>. Some  
318 participants produced adult-directed songs that shared features with the intended soothing nature of the  
319 infant-directed songs; data on the intended behavioral context of each adult-directed song are in Extended  
320 Data Table 5.

321 All recordings were made with Zoom H2n digital audio recorders, using foam windscreens (where available).  
322 To ensure that participants were audible along with researchers, who stated information about the participant  
323 and environment before and after the vocalizations, recordings were made with a 360° dual  $x-y$  microphone  
324 pattern. This produced two uncompressed stereo audio files (WAV) per participant at 44.1 kHz; we only  
325 analyzed audio from the two-channel file on which the participant was loudest.

326 The principal investigator at each fieldsite provided standardized background data on the behavior and cultural  
327 practices of the society (e.g., whether there was access to mobile-phones/TV/radio, and how commonly people  
328 used ID speech or song in their daily lives). Most items were based on variables included in the D-PLACE  
329 cross-cultural corpus<sup>98</sup>.

330 The 21 societies varied widely in their characteristics, from cities with millions of residents (Beijing) to  
331 small-scale hunter-gatherer groups of as few as 35 people (Hadza). All of the small-scale societies studied had  
332 limited access to TV, radio, and the internet, mitigating against the influence of exposure to the music and/or  
333 infant care practices of other societies. Four of the small-scale societies (Nyangatom, Toposa, Sápara/Achuar,  
334 and Mbendjele) were completely without access to these communication technologies.

335 The societies also varied in the prevalence of infant-directed speech and song in day-to-day life. The only site  
336 reported to lack infant-directed song in contemporary practice was the Quechuan/Aymaran site, although it  
337 was also noted that people from this site know infant-directed songs in Spanish and use other vocalizations  
338 to calm infants. Conversely, the Mbendjele BaYaka were noted to use infant-directed song, but rarely used  
339 infant-directed speech. In most sites, the frequency of infant-directed song and speech varied. For example,  
340 among the Tsimane, song was reportedly infrequent in the context of infant care; when it appears, however,  
341 it is apparently used to soothe and encourage infants to sleep.

342 Our default strategy was to analyze all available audio from the corpus. In some cases, however, this was  
343 inadvisable (e.g., in the naïve listener experiment, when a listener might understand the language of the  
344 recording, and make a judgment based on the recording’s linguistic content rather than its acoustic content);  
345 all exclusion decisions are explicitly stated throughout.

## 346 Acoustic analyses

### 347 Acoustic feature extraction

348 We manually extracted the longest continuous and uninterrupted section of audio from each recording (i.e.,  
349 isolating vocalizations by the participant from interruptions from other speakers, the infant, and so on), using  
350 Adobe Audition. We then used the silence detection tool in Praat<sup>99</sup>, with minimum sounding intervals at 0.1  
351 seconds and minimum silent intervals at 0.3 seconds, to remove all portions of the audio where the participant  
352 was not speaking (i.e., the silence between vocalization phrases). These were manually concatenated in  
353 Python, producing denoised recordings, which were subsequently checked manually to ensure minimal loss of  
354 content.

355 We extracted and subsequently analyzed acoustic features using Praat<sup>99</sup>, MIRtoolbox<sup>100</sup>, temporal modularity  
356 using discrete Fourier transforms for rhythmic variability<sup>101</sup>, and normalized pairwise variability indices<sup>102</sup>.  
357 These features consisted of measurements of pitch (e.g.,  $F_0$ , the fundamental frequency), timbre (e.g.,

roughness), and rhythm (e.g., tempo; n.b., because temporal measures would be affected by the concatenation process, we computed these variables on unconcatenated audio only); all summarized over time: producing 94 variables in total. We standardized feature values within-voices, eliminating between-voice variability. Further technical details are in SI Text 1.1.

For both the LASSO analyses (Fig. 1b) and the regression-based acoustic analyses (Fig. 2), we restricted the variable set to 27 summary statistics of median and interquartile range, as these correlated highly with other summary statistics (e.g., maximum, range) but were less sensitive to extreme observations.

## LASSO modeling

We trained least absolute shrinkage and selection operator (LASSO) logistic classifiers with cross-validation using `tidymodels`<sup>103</sup>. For both speech and song, these models were provided with the set of 27 acoustic variables described in the previous section. These raw features were then demeaned for speech and song separately within-voices and then normalized at the level of the whole corpus. During model training, multinomial log-loss was used as an evaluation metric to fit the lambda parameter of the model.

For the main analyses (Fig. 1b, Extended Data Table 2, and Extended Data Fig. 2) we used a  $k$ -fold cross-validation procedure at the level of fieldsites. Alternate approaches used  $k$ -fold cross-validation at the levels of language family and world region (Extended Data Fig. 1). We evaluated model performance using a receiver operating characteristic metric, binary area-under-the-curve (AUC). This metric is commonly used to evaluate the diagnostic ability of a binary classifier; it yields a score between 0% and 100%, with a chance level of 50%.

## Mixed-effects modeling

Following a preregistered exploratory-confirmatory design, we fitted a multi-level mixed-effects regression predicting each acoustic variable from the vocalization types, after adjusting for voice and fieldsite as random effects, and allowing them to vary for each vocalization type separately. To reduce the risk of Type I error, we performed this analysis on a randomly selected half of the corpus (exploratory, weighting by fieldsite) and only report results that successfully replicated in the other half (confirmatory). We did not correct for multiple tests because the exploratory-confirmatory design restricts the tests to those with a directional prediction.

These analyses deviated from the preregistration in two minor ways. First, we retained planned comparisons within vocalization types, but we eliminated those that compared across speech and song when we found much larger acoustic differences between speech and song overall than the differences between infant- and adult-directed vocalizations (a fact we failed to predict). As such, we adopted the simpler approach of post-hoc comparisons that were only within speech and within song. For transparency, we still report the preregistered post-hoc tests in Extended Data Fig. 7, but suggest that these comparisons be interpreted with caution. Second, to enable fieldsite-wise estimates (reported in Extended Data Table 4), we normalized the acoustic data corpus-wide and included a random effect of participant, rather than normalizing within-voices (as within-voice normalization would set all fieldsite-level effects to 0, making cross-fieldsite comparisons impossible).

## Naïve listener experiment

We analyzed all data available at the time of writing this paper from the “Who’s Listening?” game at <https://themusiclab.org/quizzes/ids>, a continuously running jsPsych<sup>104</sup> experiment distributed via Pushkin<sup>105</sup>, a platform that facilitates large-scale citizen-science research. This approach involves the recruitment of volunteer participants, who typically complete experiments because the experiments are intrinsically rewarding, with larger and more diverse samples than are typically feasible with in-laboratory research<sup>106,107</sup>. A total of 68,206 participants began the experiment, the first in January 2019 and the last in October 2021. Demographics in the sub-sample of United States participants are in Extended Data Table 7.

403 We played participants vocalizations from a subset of the corpus, excluding those that were less than 10  
404 seconds in duration ( $n = 111$ ) and those with confounding sounds produced by a source other than the target  
405 voice in the first 5 seconds of the recording (e.g., a crying baby or laughing adult in the background;  $n =$   
406  $366$ ), as determined by two independent annotators who remained unaware of vocalization type and fieldsite  
407 with disagreements resolved by discussion. A test of the robustness of the main effects to this exclusion  
408 decision is in SI Text 1.3. We also excluded participants who reported having previously participated in the  
409 same experiment ( $n = 3,889$ ); participants who reported being younger than 12 years old ( $n = 1,519$ ); and  
410 those who reported having a hearing impairment ( $n = 1,437$ ).

411 This yielded a sample of 49,241 participants (gender: 22,036 female, 26,128 male, 1,036 other, 41 did  
412 not disclose; age: median 22 years, interquartile range 18-29). Participants self-reported living in 186  
413 different countries (Fig. 3b) and speaking 196 different languages fluently (including 169 native and 147  
414 second languages); roughly half the participants were native English speakers from the United States. We  
415 supplemented these data with a paid online experiment, to increase the sampling of a subset of recordings in  
416 the corpus (SI Text 1.7).

417 Participants listened to at least 1 and at most 16 vocalizations drawn from the subset of the corpus (as they  
418 were free to leave the experiment before completing it) for a total of 478,136 ratings (infant-directed song:  $n$   
419  $= 134,861$ ; infant-directed speech:  $n = 95,998$ ; adult-directed song:  $n = 127,449$ ; adult-directed speech:  $n =$   
420  $119,828$ ). The vocalizations were selected with weighted randomization, such that a set of 16 trials included 4  
421 vocalizations in English and 12 in other languages; this method ensured that participants heard a substantial  
422 number of non-English vocalizations. This yielded a median of 497 ratings per vocalization (interquartile  
423 range 304-546.75; range 46-686) and thousands of ratings for each society (median = 22,134; interquartile  
424 range 16,846-24,281). The experiment was conducted only in English, so participants likely had at least a  
425 cursory knowledge of English; a test of the robustness of the main effects when excluding English-language  
426 recordings is in SI Text 1.3.

427 We asked participants to classify each vocalization as either directed toward a baby or an adult. The prompt  
428 “Someone is speaking or singing. Who do you think they are singing or speaking to?” was displayed while the  
429 audio played; participants could respond with either “adult” or “baby”, either by pressing a key corresponding  
430 to a drawing of an infant or adult face (when the participant used a desktop computer) or by tapping one of  
431 the faces (when the participant used a tablet or smartphone). The locations of the faces (left vs. right on a  
432 desktop; top vs. bottom on a tablet or smartphone) were randomized participant-wise. Screenshots are in  
433 Extended Data Fig. 4.

434 We asked participants to respond as quickly as possible, a common instruction in perception experiments,  
435 to reduce variability that could be introduced by participants hearing differing lengths of each stimulus; to  
436 reduce the likelihood that participants used linguistic content to inform their decisions; and to facilitate a  
437 response-time analysis (Extended Data Fig. 8), as jsPsych provides reliable response time data<sup>108</sup>. We also  
438 used the response time data as a coarse measure of compliance, by dropping trials where participants were  
439 likely inattentive, responding very quickly (less than 500 ms) or slowly (more than 5 s). Most response times  
440 fell within this time window (82.1% of trials).

441 The experiment included two training trials, using English-language recordings of a typically infant-directed  
442 song (“The wheels on the bus”) and a typically adult-directed song (“Hallelujah”); 89.0% of participants  
443 responded correctly by the first try and 96.5% responded correctly by the second try, implying that the vast  
444 majority of the participants understood the task.

445 As soon as they made a choice, playback stopped. After each trial, we told participants whether or not they  
446 had answered correctly and how long, in seconds, they took to respond. At the end of the experiment, we  
447 showed participants their total score and percentile rank (relative to other participants).

## 448 End notes

### 449 Data, code, and materials availability

450 A reproducible R Markdown manuscript; data, analysis code, and visualizations; supplementary fieldsite-  
451 level data; the recording collection protocol; and code for the naïve listener experiment are available at  
452 <https://github.com/themusiclab/infant-speech-song>. The audio corpus is available at <https://doi.org/10.5281/zenodo.5525161>. The preregistration for the auditory analyses is at <https://osf.io/5r72u>. Readers may  
453 participate in the naïve listener experiment by visiting <https://themusiclab.org/quizzes/ids>.  
454

### 455 Acknowledgments

456 This research was supported by the Harvard University Department of Psychology (M.M.K. and S.A.M.); the  
457 Harvard College Research Program (H.L.R.); the Harvard Data Science Initiative (S.A.M.); the National  
458 Institutes of Health Director's Early Independence Award DP5OD024566 (S.A.M. and C.B.H.); the Academy  
459 of Finland Grant 298513 (J.A.); the Royal Society of New Zealand Te Apārangi Rutherford Discovery  
460 Fellowship RDF-UOA1101 (Q.D.A., T.A.V.); the Social Sciences and Humanities Research Council of Canada  
461 (L.K.C.); the Polish Ministry of Science and Higher Education grant N43/DBS/000068 (G.J.); the Fogarty  
462 International Center (P.M., A.S., C.D.P.); the National Heart, Lung, and Blood Institute, and the National  
463 Institute of Neurological Disorders and Stroke Award D43 TW010540 (P.M., A.S.); the National Institute of  
464 Allergy and Infectious Diseases Award R15-AI128714-01 (P.M.); the Max Planck Institute for Evolutionary  
465 Anthropology (C.T.R., C.M.); a British Academy Research Fellowship and Grant SRG-171409 (G.D.S.); the  
466 Institute for Advanced Study in Toulouse, under an Agence nationale de la recherche grant, Investissements  
467 d'Avenir ANR-17-EURE-0010 (L.G., J. Stieglitz); the Fondation Pierre Mercier pour la Science (C.S.); and  
468 the Natural Sciences and Engineering Research Council of Canada (S.E.T.). We thank the participants and  
469 their families for providing recordings; L. Sugiyama, for supporting pilot data collection; J. Du, E. Pillsworth,  
470 P. Wiessner, and J. Ziker, who collected or attempted to collect additional recordings; S. Atwood, A. Bergson,  
471 Z. Jurewicz, D. Li, L. Lopez, E. Radytė, and S. Ccari Cutipa for research assistance; and J. Kominsky, L.  
472 Powell, and L. Yurдум for feedback on the manuscript.

### 473 Author contributions

- 474 • S.A.M. and M.M.K. conceived of the research, provided funding, and coordinated the recruitment of  
475 collaborators and creation of the corpus.
- 476 • S.A.M. and M.M.K. designed the protocol for collecting vocalization recordings with input from D.A.,  
477 who piloted it in the field.
- 478 • L.G., A.G., G.J., C.T.R., M.B.N., A.M., L.K.C., S.E.T., J. Song, M.K., A.S., T.A.V., Q.D.A., J.A.,  
479 P.M., A.S., C.D.P., G.D.S., S.K., M.S., S.A.C., J.Q.P., C.S., J. Stieglitz, C.M., R.R.S., and B.M.W  
480 collected the field recordings.
- 481 • S.A.M., C.M.B., and J. Simson designed and implemented the online experiment.
- 482 • C.J.M. and H.L.R. processed all recordings and designed the acoustic feature extraction with S.A.M.  
483 and M.M.K.; C.M.B. provided associated research assistance.
- 484 • C.M. designed the fieldsite questionnaire with assistance from M.B. and C.J.M., who collected the data  
485 from the principal investigators.
- 486 • C.B.H. and S.A.M. led analyses, with additional contributions from C.J.M., M.B., and D.K., and  
487 M.M.K.
- 488 • C.B.H. and S.A.M. designed the figures.
- 489 • C.B.H. wrote computer code, with contributions from S.A.M., C.J.M., and M.B.
- 490 • C.J.M., H.L.R., M.M.K., and S.A.M. wrote the initial manuscript.
- 491 • C.B.H. and S.A.M. wrote the first revision, with contributions from C.J.M. and M.B.
- 492 • S.A.M. wrote the second revision, with contributions from C.B.H. and C.J.M., and all authors approved  
493 it.



## 494 **Ethics**

495 Ethics approval for the collection of recordings was provided by local institutions and/or the home institution  
496 of the collaborating author who collected data at each fieldsite. These included the Bioethics Committee,  
497 Jagiellonian University (1072.6120.48.2017); Board for Research Ethics, Åbo Akademi University; Committee  
498 on the Use of Human Subjects, Harvard University (IRB16-1080 and IRB18-1739); Ethics Committee,  
499 School of Psychology, Victoria University of Wellington (0000023076); Human Investigation Committee, Yale  
500 University (MODCR00000571); Human Participants Ethics Committee, University of Auckland (018981);  
501 Human Research Protections Program, University of California San Diego (161173); Institutional Review  
502 Board, Arizona State University (STUDY00008158); Institutional Review Board, Florida International  
503 University (IRB-17-0067); Institutional Review Board, Future Generations University; Max Planck Institute  
504 for Evolutionary Anthropology; Research Ethics Board, University of Toronto (33547); Research Ethics  
505 Committee, University College London (13121/001); Review Board for Ethical Standards in Research,  
506 Toulouse School of Economics/IAST (2017-06-001 and 2018-09-001); and Tanzania Commission for Science  
507 and Technology (COSTECH). Ethics approval for the naïve listener experiment was provided by the Committee  
508 on the Use of Human Subjects, Harvard University (IRB17-1206). Informed consent was obtained from all  
509 participants.

## 510 **Additional information**

511 The authors declare no competing interests.

512 **Supplementary information** is available for this paper.

513 **Correspondence and requests for materials** should be addressed to C.B.H., C.J.M., and S.A.M.

## 514 Supplementary Text

### 515 1.1 Technical details of the acoustic feature extraction

516 We extracted acoustic features with four sets of tools, described below, and also preprocessed them to reduce  
517 the influence of atypical observations.

#### 518 1.1.1 Praat

519 We extracted intensity, pitch, and first and second formant values from the denoised recordings every 0.03125  
520 seconds. For female participants, the pitch floor was set at 100 Hz, with a pitch ceiling at 600 Hz, and  
521 a maximum formant of 5500 Hz. For male participants, these values were 75 Hz, 300 Hz, and 5000 Hz,  
522 respectively. From these data, several summary values were calculated for each recording: mean and maximum  
523 first and second formants, mean pitch, and minimum intensity. In addition to these summary statistics, we  
524 measured the intensity and pitch rates as change in these values over time. For vowel measures, the first and  
525 second formants were used to calculate both the average vowel space used, as well as the vowel change rate  
526 (measured as change in Euclidean formant space) over time.

#### 527 1.1.2 MIRtoolbox

528 All MIRtoolbox (v. 1.7.2) features were extracted with default parameters<sup>100</sup>. *mirattackslope* returns a list  
529 of all attack slopes detected, so final analyses were done on summary features (e.g., mean, median, etc.).  
530 Final analyses were also done on summary features for *mirroughness*, which returns time series data of  
531 roughness measures in 50ms windows. We RMS-normalized the mean of *mirroughness*, following previous  
532 work<sup>109</sup>. MIRtoolbox features were computed on the denoised recordings, with the exception of *mirtempo*  
533 and *mirpulseclarity*, where removing the silences between vocalizations would have altered the tempo.

#### 534 1.1.3 Rhythmic variability

535 For temporal modulation spectra we followed a previous method<sup>110</sup>, which combines discrete Fourier transforms  
536 applied to contiguous six-second excerpts. To analyze the entirety of each recording, we appended all recordings  
537 with silence to be exact multiples of six-seconds. The location of the peak (Hz) and variance of the temporal  
538 modulation spectra were extracted from their RMS values. Because intervening silence would influence  
539 temporal modulation measures, we computed them on recordings *before* they had been denoised.

#### 540 1.1.4 Normalized pairwise variability index (nPVI)

541 The nPVI represents the temporal variance of data with discrete events, which makes it especially useful for  
542 comparing speech and music<sup>101</sup>. We used an automated syllable- and phrase-detection algorithm to extract  
543 events<sup>102</sup>. We computed nPVI in two ways: by averaging the nPVI of each phrase within a recording, as  
544 well as by treating the entire recording as a single phrase. Because intervening silence would influence nPVI  
545 measures, we computed them on recordings *before* they had been denoised.

#### 546 1.1.5 Preprocessing

547 Automated acoustic analyses are highly sensitive at extremes (e.g., impossible values caused by non-vocal  
548 sounds, like loud wind). To correct for these issues, we Winsorized all acoustic variables. This process defines  
549 observations exceeding the lowest and highest 5 percentile ranks as outliers, recoding them as the values  
550 of those percentile boundaries. These data were used for all acoustic analyses. This approach is generally  
551 preferable to trimming extreme values, as trimming overcompensates for outliers by removing them entirely<sup>111</sup>.

552 Analyses of the acoustic features using an alternate method (i.e., imputing extreme values with the mean  
553 observation for each feature within each fieldsite) yielded comparable results; readers are welcome to try  
554 alternate trimming methods with the open data and materials.

555 In the cases of three acoustic features (roughness, vowel travel rate, and pulse clarity), we used log-transformed  
556 data, because the raw data were highly skewed. This decision was supported by the exploratory-confirmatory  
557 approach; that is, results replicated across both exploratory and confirmatory samples in the log-transformed  
558 data.

## 559 1.2 Alternate analysis of acoustic features via principal-components approach

560 We conducted an exploratory principal components analysis of the full 94 acoustic variables (Extended  
561 Data Fig. 3). The analysis accounted for ~40% of total variability in acoustic features. The results provide  
562 convergent evidence that the main forms of acoustic variation partition into orthogonal clusters that most  
563 strongly distinguish speech from song overall (in PC1); most strongly distinguish infant-directedness in  
564 *song* (in PC2); and most strongly distinguish infant-directedness in *speech* (in PC3). Factor loadings are in  
565 Extended Data Table 8; these largely corroborate the findings of the LASSO and exploratory-confirmatory  
566 analyses.

567 One further pattern that the principal components analysis highlights is that infant-directedness makes speech  
568 more “songlike”, in terms of higher pitch and reduced roughness (PC3); but speech strongly differed from song  
569 overall in terms of the variability and rate of variability of pitch, intensity, and vowels, and infant-directedness  
570 further exaggerated these differences for speech (PC1).

## 571 1.3 Robustness tests of main results in naïve listener experiment

572 On the suggestion of an anonymous reviewer, we repeated the main analyses of the naïve listener experiment  
573 (i.e., estimated sensitivity to infant-directedness in speech and song) with two alternate data exclusion  
574 strategies. First, the analyses and figures in the main text only study ratings of recordings that contained  
575 minimal extraneous sounds (such as a baby crying; see Methods). To ensure that the exclusion of these  
576 recordings did not account for the main findings, we repeated the analyses while including ratings of *all*  
577 recordings, including those with putatively confounding background sounds. They robustly replicated, with  
578 comparable effect sizes (speech:  $d' = 1.13$ , 95% CI [0.48, 1.78]; song:  $d' = 0.54$ , 95% CI [0.23, 0.86];  $ps < .05$ ).

579 A further potential confound concerns listeners’ familiarity with the languages spoken or sung in the recordings.  
580 In the main text analyses, we explicitly model the expected differences in sensitivity that could result from  
581 lower or higher degrees of linguistic relatedness between the vocalizer and the listener (see, e.g., Fig. 3c).  
582 However, because the experiment was only conducted in English, many participants likely could understand  
583 at least some parts of the English-language vocalizations. To ensure that these recordings did not account for  
584 the main findings, we repeated the analyses while excluding all English-language recordings. These recordings  
585 came predominantly from the Wellington, San Diego, and Toronto fieldsites (where nearly all recordings were  
586 in English) but also appeared elsewhere, such as the Arawak fieldsite (where English Creole recordings were  
587 often comprehensible to English speakers), and in a few other sites, when a speaker happened to be bilingual  
588 and produce English-language vocalizations. The results robustly replicated with these exclusions (speech:  $d'$   
589 = 0.83, 95% CI [0.32, 1.33]; song:  $d' = 0.33$ , 95% CI [0.08, 0.57];  $ps < .05$ ).

## 590 1.4 Demographic analyses of a subsample of naïve listeners

591 An anonymous reviewer raised the possibility that conducting the naïve listener experiment online, as opposed  
592 to in a laboratory, reduced the diversity of the sample; if so, this could bias the results of the experiment, in  
593 principle. To test this question, we analyzed demographic information from participants living in the United  
594 States, who provided income, education level, and ethnicity data.

595 Descriptive statistics revealed that the subsample of United States participants was highly diverse (Extended  
596 Data Table 7), including, for example, representation from all ethnicity categories currently defined by the  
597 National Institutes of Health, and a broad range of annual household incomes. The sample was generally  
598 more representative of the United States population than are samples recruited in typical laboratory studies,  
599 which may skew towards wealthier samples with representation of fewer ethnicity categories<sup>105,107</sup>.

600 Nevertheless, we proceeded by asking whether demographic factors were likely to affect people’s ability to  
601 perceive infant-directedness. We ran mixed-effect regressions for each of the available demographic variables,  
602 hierarchically adjusting for world-region, fieldsite, and vocalist, with fixed effects for vocalization type and  
603 the demographic factor. While the main effects of income, education, or race on task performance were  
604 statistically significant ( $ps < 0.0001$ ), in all cases, the effect sizes were tiny, explaining  $\sim 0.1\%$  of variance in  
605 the model. These findings imply that the choice of a citizen-science approach likely did not bias the results of  
606 the experiment, at least in United States participants.

## 607 1.5 Society-level predictors for naïve listener data

608 Listener sensitivity within each fieldsite was correlated with a number of society-level characteristics: rank-  
609 order population size (speech:  $\tau = 0.51$ ; song:  $\tau = 0.57$ ), distance from fieldsite to nearest urban center  
610 (speech:  $r = -0.78$ ; song:  $r = -0.50$ ), and number of children per family (speech:  $r = -0.51$ ; song:  $r = -0.71$ ; all  
611  $ps < .001$ ). Each of these predictors were highly correlated with each other (all  $r > 0.6$ ), however, suggesting  
612 that they did not each contribute unique variance. There was no correlation with ratings of how frequently  
613 infant-directed vocalizations were used within each society ( $ps > .4$ ). These findings suggest that at least  
614 some cross-fieldsite variability in listener sensitivity to infant-directedness is attributable to the *cultural*  
615 relatedness between vocalizers and listeners (as opposed to the *linguistic* relatedness analyzed in in the Main  
616 Text and Fig. 3c).

## 617 1.6 Simulated infant-directed vocalizations

618 Prior research has shown that simulated infant-directedness is qualitatively similar, albeit less exaggerated  
619 than when authentic, for both speech<sup>112</sup> and song<sup>35</sup>. Indeed, a model of the naïve listener results adjusting  
620 for fieldsite indeed showed a small decrease in “baby” guesses when an infant was not present (ID song: 7.1%,  
621 ID speech: 8.4%, AD song: 6.5%, AD speech: 4.3%,  $ps < .0001$ ), and this effect was stronger for vocalizations  
622 that were infant-directed than adult-directed ( $\chi^2(1) = 5.67$ ,  $p = 0.02$ ). Both the naïve listener results and  
623 acoustic analyses were robust to whether these simulated infant-directed vocalizations were included or  
624 excluded, however, implying that the use of simulated infant-directed vocalizations did not undermine the  
625 robustness of the main effects.

## 626 1.7 Additional data collection via Prolific

627 In revising this manuscript, we discovered that a small subset of the corpus had been erroneously excluded  
628 from the main experiment. In most cases, these were recordings that had been too-conservatively edited to  
629 be too short to include in the experiment (but could reasonably be edited to include longer sections of audio);  
630 in some other cases, the original excerpting included confounding background noises that, upon additional  
631 editing, were avoidable. To ensure maximal coverage of the fieldsites studied here, we re-excerpted the audio  
632 of 103 examples and collected supplemental naïve listener data on these recordings via a Prolific experiment  
633 ( $N = 97$ , 54 male, 42 female, 1 other, mean age = 29.7 years). The Prolific experiment was identical to the  
634 citizen-science experiment, except that each participant was paid US\$15/hr, rather than volunteering; and  
635 each participant rated 188 recordings instead of up to 16.

636 We included in the Prolific experiment the set of recordings that were erroneously excluded from the citizen-  
637 science experiment, along with 85 additional recordings randomly selected from those that *were* included in the  
638 citizen-science experiment, so as to ensure that each Prolific participant heard a balanced set of vocalization  
639 types. The two cohorts’ ratings of the recordings in common across the two experiments were highly correlated

<sup>640</sup> ( $r = 0.95, p < 0.0001$ ), demonstrating that they had similar intuitions concerning infant-directedness in speech  
<sup>641</sup> and song. As such, in the main text, we report all the ratings together without disambiguating between the  
<sup>642</sup> cohorts.

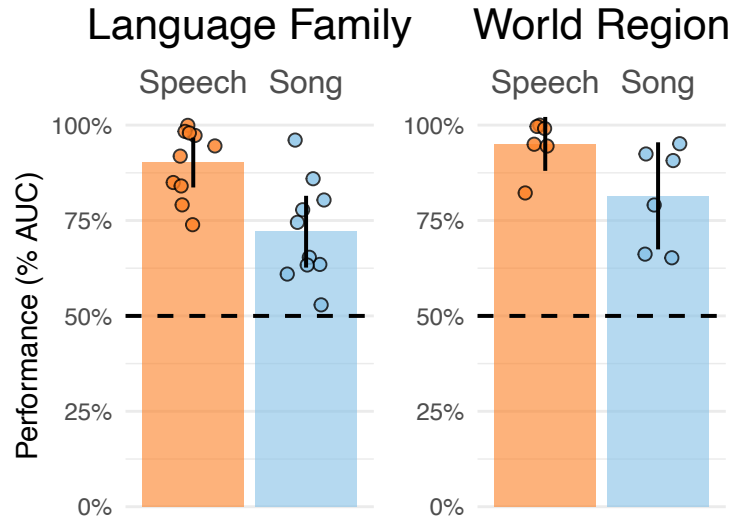

**Extended Data Fig. 1 | LASSO classification of acoustic features with alternate cross-validation approaches.** We repeated the main LASSO analysis (Fig. 1b) twice, but rather than conducting  $k$ -fold cross-validation across fieldsites, we did so across language families and world regions (see descriptive information about the fieldsites in Table 1). The results replicated robustly across both models, with corpus-wide classification performance significantly above chance in all cases. The vertical bars represent the overall classification performance (quantified via receiver operating characteristic/area under the curve; AUC); the error bars represent 95% confidence intervals; the points represent the performance estimate for each language family or world region; and the horizontal dashed lines indicate chance level of 50% AUC.

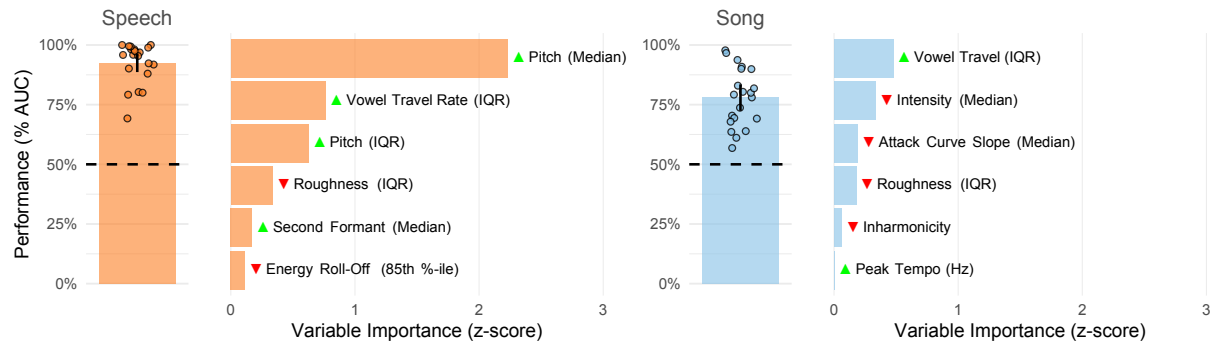

**Extended Data Fig. 2 | Replication of main LASSO results using unedited audio.** As a test of robustness, we repeated the main LASSO analyses (Fig. 1b) with acoustic features extracted from raw, unedited audio. This approach ensures that the main results are not attributable to idiosyncrasies in the audio introduced by the editing process. The results repeated robustly, with above-chance performance in all fieldsites for both speech and song, and with the 3 most influential acoustic features selected by the model repeating across both specifications (see Fig. 1b). The vertical bars represent the overall classification performance (quantified via receiver operating characteristic/area under the curve; AUC); the error bars represent 95% confidence intervals; the points represent the average performance for each fieldsite; and the horizontal dashed lines indicate chance level of 50% AUC. The horizontal bars show the acoustic characteristics with the largest influence in each classifier; the green and red triangles indicate the direction of the effect, e.g., with median pitch having a large, positive effect on classification of infant-directed speech. See Methods for further details.

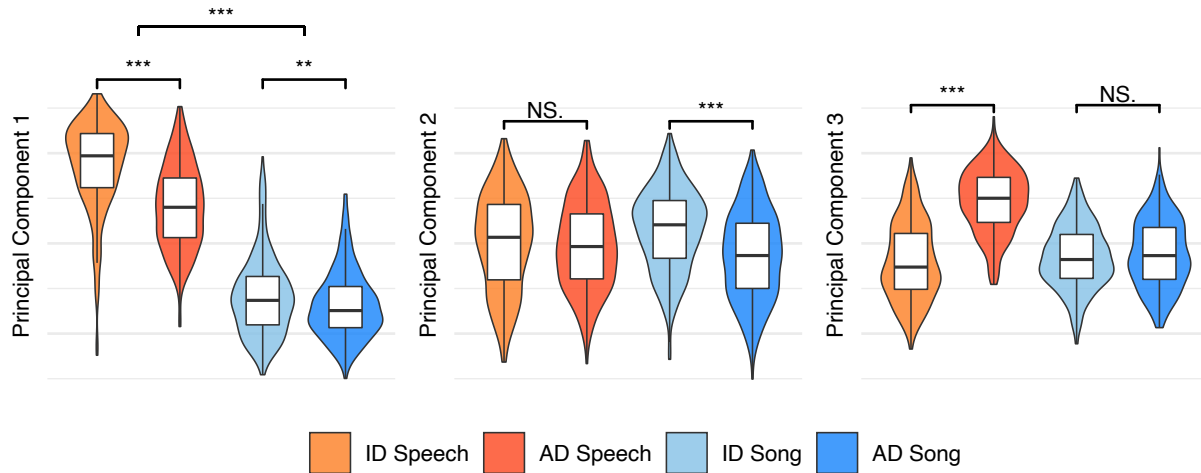

**Extended Data Fig. 3 | Principal-components analysis of acoustic features.** As an alternative approach to the acoustics data, we ran a principal-components analysis on the full 94 acoustic variables, to test whether an unsupervised method also yielded opposing trends in acoustic features across the different vocalization types. It did. Three components explained approximately 40% of total variability in the acoustic features. Moreover, the clearest differences between vocalization types accorded with the LASSO and mixed-effects modeling (Figs. 1b and 2). The first principal component most strongly differentiated speech and song, overall; the second most strongly differentiated infant-directed song from adult-directed song; and the third most strongly differentiated infant-directed speech from adult-directed speech. The violins indicate kernel density estimations and the boxplots represent the medians and interquartile ranges. Significance values are computed via Wilcoxon signed-rank tests; \* $p < 0.05$ , \*\* $p < 0.01$ , \*\*\* $p < 0.001$ . Feature loadings are in Extended Data Table 8.



a

### Who's Listening?

Someone is speaking or singing. Who do you think they are singing or speaking to?

Press **F** for adult or **J** for baby.

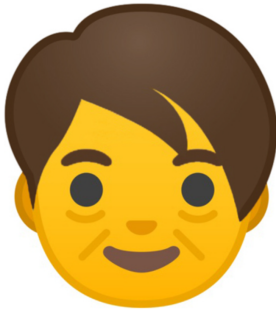

F

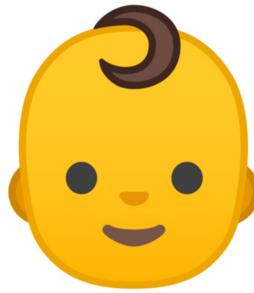

J

Try to answer as quickly as you can!

b

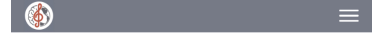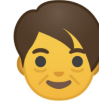

Someone is speaking or singing. Who do you think they are singing or speaking to?

Tap the character being sung to!

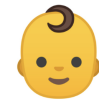

© 2019-2021

[Leave feedback](#)

**Extended Data Fig. 4 | Screenshots from the naïve listener experiment.** On each trial, participants heard a randomly selected vocalization from the corpus and were asked to quickly guess to whom the vocalization was directed: an adult or a baby. The experiment used large emoji and was designed to display comparably on desktop computers (a) or tablets/smartphones (b).

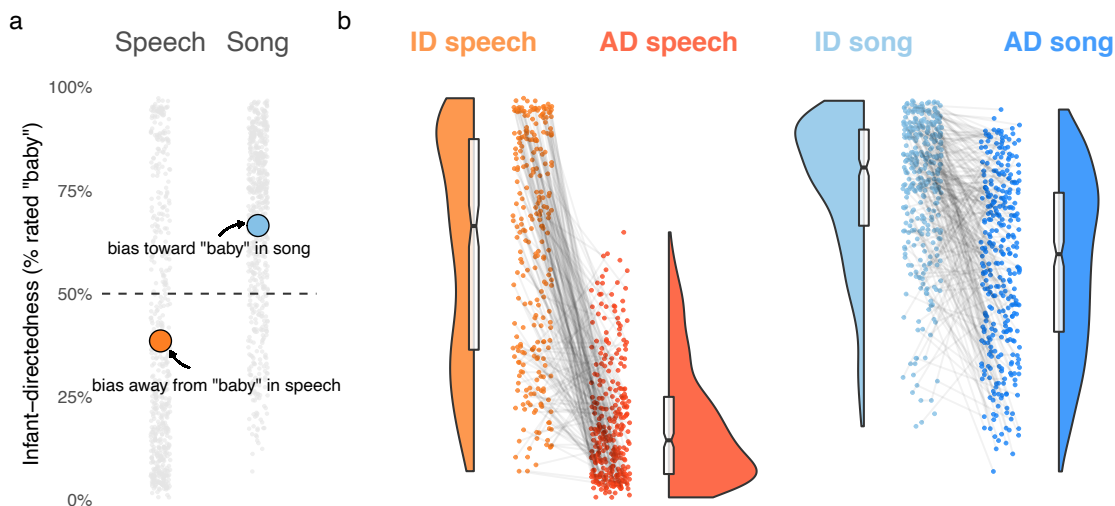

**Extended Data Fig. 5 | Response biases in the naïve listener experiment.** **a**, Listeners showed reliable biases: regardless of whether a vocalization was infant- or adult-directed, the listeners gave speech recordings substantially fewer “baby” responses than expected by chance, and gave song recordings substantially more “baby” responses. The gray points represent average ratings for each of the 1615 recordings in the corpus, split by speech and song; the orange and blue points indicate the means of each vocalization type; and the horizontal dashed line represents hypothetical chance level of 50%. **b**, Despite the response biases, within speech and song, the raw data nevertheless showed clear differences between infant-directed and adult-directed vocalizations, i.e., by comparing infant-directedness scores within the same voice, across infant-directed and adult-directed vocalizations (visible here in the steep negative slopes of the gray lines). The main text results report only  $d'$  statistics for these data, for simplicity, but the main effects are nonetheless visible here in the raw data. The points indicate average ratings for each recording; the gray lines connecting the points indicate the pairs of vocalizations produced by the same voice; the half-violins are kernel density estimations; the boxplots represent the medians, interquartile ranges, and 95% confidence intervals (indicated by the notches); and the horizontal dashed lines indicate the response bias levels (from **a**).

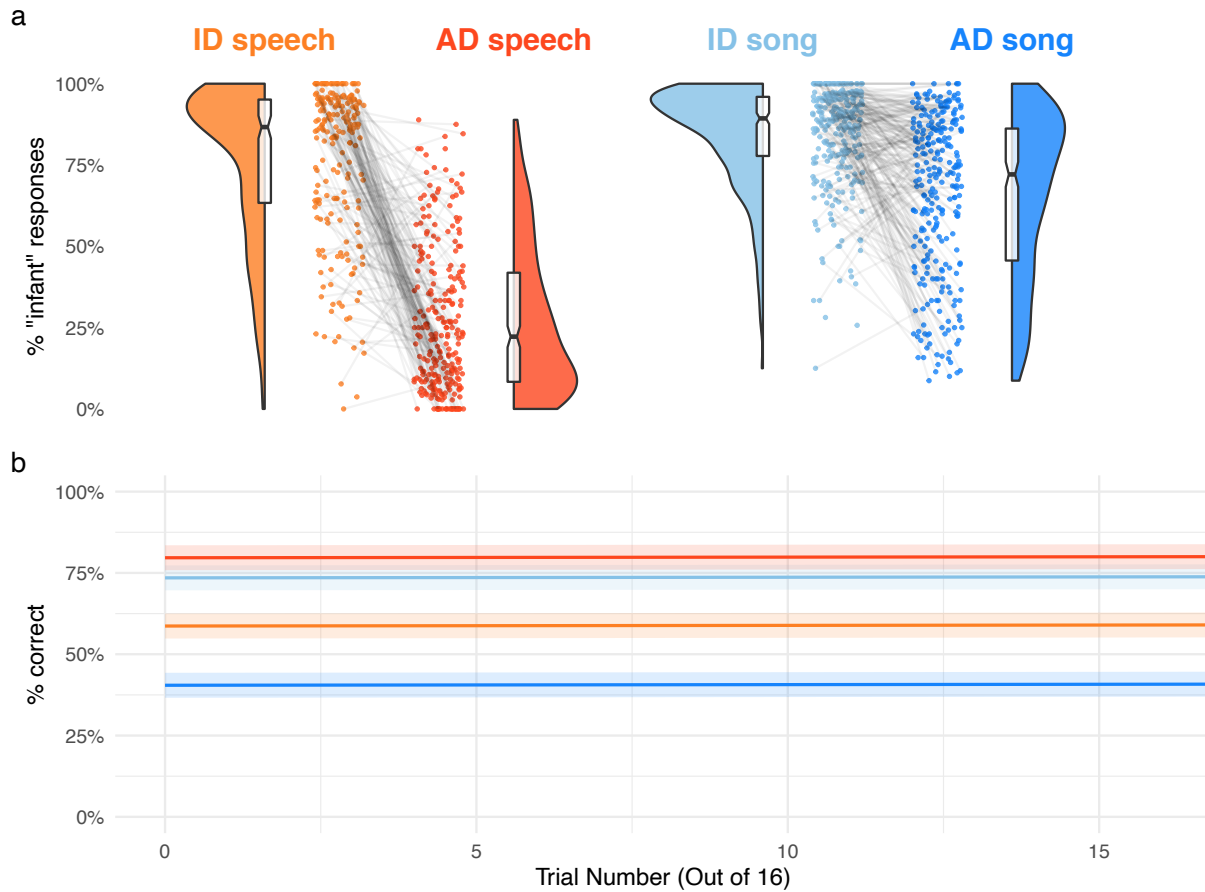

**Extended Data Fig. 6 | The main effects in the naïve listener experiment are not attributable to learning.** **a**, This panel repeats the raw accuracy data reported in Extended Data Fig. 5b, but using only data from responses that were participants' first trial, to avoid the possibility of any learning effects over the course of their participation. The results do not change appreciably. See further details in the caption to Extended Data Fig. 5. **b**, Over the course of multiple trials in the experiment, which contained corrective feedback, participants' raw accuracy barely increased. The lines depict linear regressions for each of the four vocalization types and the shaded regions depict 95% confidence intervals.

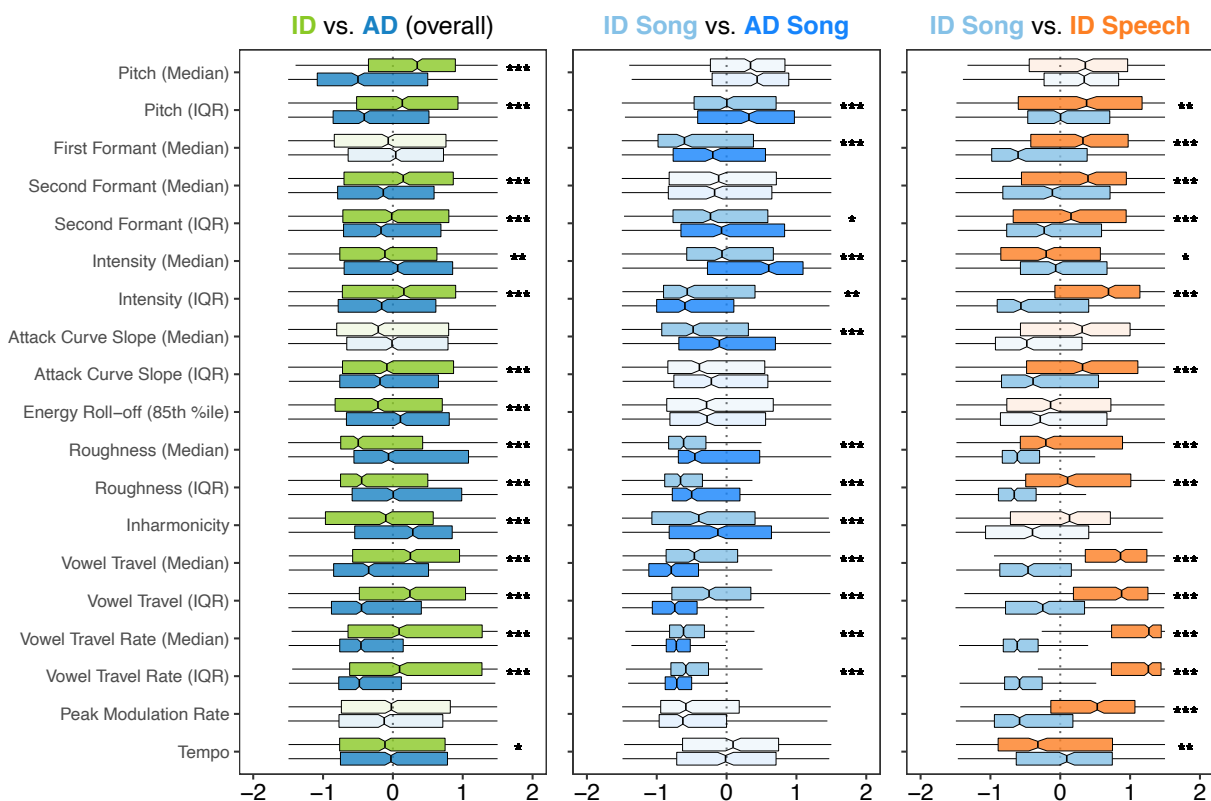

**Extended Data Fig. 7 | Exploratory-confirmatory selected acoustic features for pre-registered analyses.** The preregistered analyses included comparisons of the acoustic features of infant-directed vocalizations, regardless of whether they included speech or song. For the reasons discussed in the Methods, and per the results reported in Fig. 2, these results should be interpreted with caution, as direct comparisons of acoustic features across modalities (language vs. music) may be spurious or may hide underlying variation within each modality. Moreover, these analyses do not include fieldsite-level random effects, so they are less conservative than those reported in Fig. 2 (i.e., they identify a larger number of acoustic features). The boxplots show the 25 acoustic features with a significant difference in at least one main comparison (e.g., infant-directed song vs. infant-directed speech, in the right panel), in both the exploratory and confirmatory analyses. All variables are normalized across participants. The boxplots represent the median and interquartile range; the whiskers indicate  $1.5 \times$  IQR; and the notches represent the 95% confidence intervals of the medians. Faded comparisons did not reach significance in exploratory analyses. Significance values are computed via linear combinations, following mixed-effects models; \* $p < 0.05$ , \*\* $p < 0.01$ , \*\*\* $p < 0.001$ . Prespecified hypotheses about each comparison are posted in the project GitHub repository.

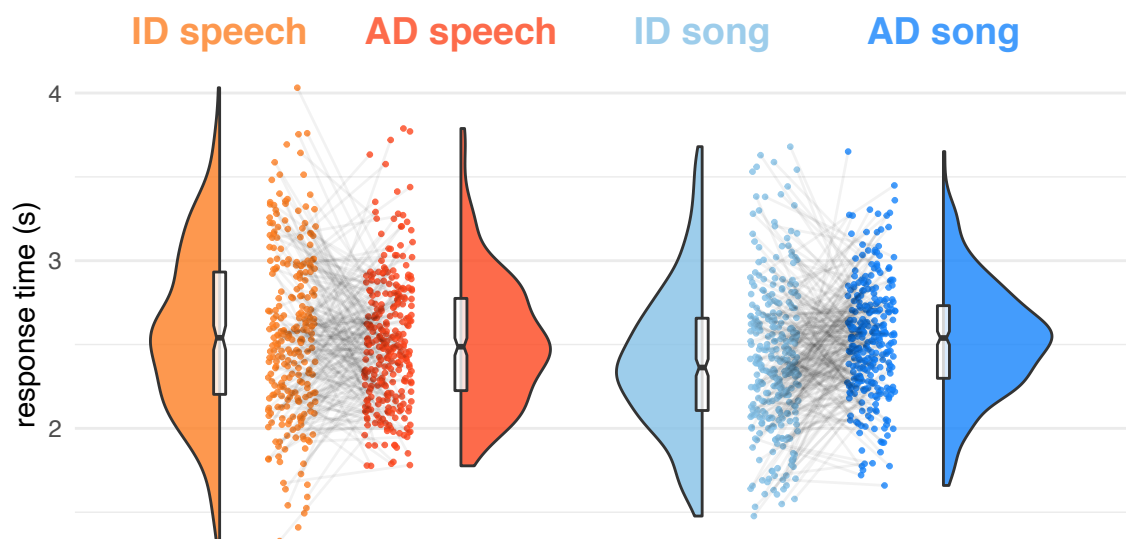

**Extended Data Fig. 8 | Response-time analysis of naïve listener experiment.** We recorded the response times of participants in their mobile or desktop browsers, using `jsPsych` (see Methods), and asked whether, when responding correctly, participants more rapidly detected infant-directedness in speech or song. They did not: a mixed-effects regression predicting the difference in response time between infant-directed and adult-directed vocalizations (within speech or song), adjusting hierarchically for fieldsite and world-region, yielded no significant differences ( $ps > .05$  from linear combination tests). The points indicate median response times for each recording across all correct responses; the gray lines connecting the points indicate the pairs of vocalizations produced by the same participant; the half-violins are kernel density estimations; and the boxplots represent the medians, interquartile ranges, and 95% confidence intervals (indicated by the notches).

| Label                  | Stub                           | Variables                                                            | Description                                                                                                                                                                                                                                                                                                                                     | Significance                                                                                                                                               |
|------------------------|--------------------------------|----------------------------------------------------------------------|-------------------------------------------------------------------------------------------------------------------------------------------------------------------------------------------------------------------------------------------------------------------------------------------------------------------------------------------------|------------------------------------------------------------------------------------------------------------------------------------------------------------|
| Attack Curve Slope     | <code>mir_attack</code>        | Mean, Med, StD, Range, Min, Max, 1st Quart, 3rd Quart, IQR, Distance | MIRtoolbox detects acoustic events in the audio; for a subset of those it can compute an attack slope from amplitude curves, which is the slope of the line from the beginning of the event to its peak.                                                                                                                                        | The slope of an attack curve provides a relative measure of "alerting components," or immediately discriminable beginnings of a vocalization.              |
| Roughness              | <code>mir_roughness</code>     | Mean, Med, StD, Range, Max, 1st Quart, 3rd Quart, IQR, Distance      | A roughness value produced by computing the peaks of the audio spectrum and taking the average of the dissonance between all possible pairs of peaks; following Buyens et al. (2017), we reduce this to a single measure by taking the RMS-normalized mean.                                                                                     | Along with inharmonicity, roughness provides one measure of dissonance in a recording. Roughness similarly provides at least one measure of vocal clarity. |
| 85th Energy Percentile | <code>mir_rolloff85</code>     | Whole                                                                | An estimate of the amount of high frequency in a signal measured by the frequency such that a 85% of the total energy is contained below it.                                                                                                                                                                                                    | The 85th energy percentile allows a comparison of relative measures of high-frequency acoustics in a vocalization.                                         |
| Inharmonicity          | <code>mir_inharmonicity</code> | Whole                                                                | An estimate of the inharmonicity in the signal produced by identifying the number of partials that are not multiples of the fundamental frequency (i.e. those outside of the ideal harmonic range).                                                                                                                                             | Along with roughness, inharmonicity provides a more precise measure of dissonance in a vocalization.                                                       |
| Tempo                  | <code>mir_tempo</code>         | Whole                                                                | A tempo estimate made by detecting periodicities from MIR's event detection curves. Outputs a single number.                                                                                                                                                                                                                                    | Tempo allows assessment of the speed or pace of a vocalization.                                                                                            |
| Pulse Clarity          | <code>mir_pulseclarity</code>  | Whole                                                                | Estimates the rhythmic clarity, or strength of the beats (Lartillot et al. 2008).                                                                                                                                                                                                                                                               | Pulse clarity provides a measure of the vocal clarity of a speaker or emphasis on individual utterances.                                                   |
| nPVI Recording         | <code>npvi_total</code>        | Whole                                                                | The nPVI equation measures the "average degree of durational contrast between adjacent events in a sequence" (Daniele & Patel, 2015). This makes it especially useful for comparing rhythmic units across language and music (i.e., syllables vs. notes). To automatically detect events, we used Mertens' (2004) syllable detection algorithm. | By providing a measure of durational contrast, nPVI_total is a measure of rhythmic complexity in a recording.                                              |
| nPVI Phrase            | <code>npvi_phrase</code>       | Whole                                                                | In addition to detecting syllables, Mertens' algorithm detects phrases. Whereas <code>npvi_total</code> computes nPVI based on the whole file as a continuous phrase, this measure computes the nPVI for each detected phrase and reports the mean. In other words, it excludes the distances between the ends and beginnings of phrases.       | nPVI_phrase provides a more granular measure of rhythmic complexity, within phrases, rather than between them.                                             |

(continued)

| Label                   | Stub                            | Variables                                                  | Description                                                                                                                                                                                                                                                                                                                                                                                                                                                                                                                                                                                                                                        | Significance                                                                                                                                                                                                                                               |
|-------------------------|---------------------------------|------------------------------------------------------------|----------------------------------------------------------------------------------------------------------------------------------------------------------------------------------------------------------------------------------------------------------------------------------------------------------------------------------------------------------------------------------------------------------------------------------------------------------------------------------------------------------------------------------------------------------------------------------------------------------------------------------------------------|------------------------------------------------------------------------------------------------------------------------------------------------------------------------------------------------------------------------------------------------------------|
| Temporal Modulation     | <code>tm_peak_hz</code>         | Whole                                                      | The temporal modulation spectrum is the frequency decomposition of the amplitude envelope of a signal. This measures how loud something is at any given moment. We then measure how fast the loudness changes. For example: if someone sings a note every second, the spectrum will have a peak at 1Hz. If someone sings a note three times a second, but with an emphasis every three seconds, there will be a large peak at 1Hz, and a smaller peak at 3Hz. The peak of the spectrum is the frequency of the amplitude spectrum which has the highest root mean square of a given recording and represents a raw value of the recording's tempo. | The peak of the temporal modulation spectrum provides a measure of how maximally modulated, or variable, the onset of notes are in a recording, providing a raw measure of metre for speech and song.                                                      |
| Temporal Modulation     | <code>tm_std_hz</code>          | StD                                                        | The temporal modulation spectrum is the frequency decomposition of the amplitude envelope of a signal. This measures how loud something is at any given moment. We then measure how fast the loudness changes. For example: if someone sings a note every second, the spectrum will have a peak at 1Hz. If someone sings a note three times a second, but with an emphasis every three seconds, there will be a large peak at 1Hz, and a smaller peak at 3Hz. The standard deviation of the spectrum is taken as a measure of how exaggerated the peak is.                                                                                         | The standard deviation of temporal modulation allows for an assessment of the overall variability of temporal modulations in a recording, providing a coarse measure of rhythm, with a lower standard deviation leaning towards more monorhythmic signals. |
| Pitch                   | <code>praat_f0</code>           | Mean, Med, StD, Range, Min, Max, 1st Quart, 3rd Quart, IQR | The fundamental frequency (f0) in Hertz for each recording                                                                                                                                                                                                                                                                                                                                                                                                                                                                                                                                                                                         | Pitch provides a fundamental measure of the highness or lowness, in frequency, of an utterance. Likewise, the shape of the pitch curve and the overall value of pitch is a common discriminable feature in both speech and song.                           |
| Pitch Space             | <code>praat_f0travel</code>     | Mean, Med, StD, Range, Max, 1st Quart, 3rd Quart, IQR      | The distance between f0 at each .03125/sec interval to the next.                                                                                                                                                                                                                                                                                                                                                                                                                                                                                                                                                                                   | Pitch space provides a dynamic measure of pitch's range over time.                                                                                                                                                                                         |
| Pitch Rate              | <code>praat_pitch_rate</code>   | Whole, Med, IQR                                            | The pitch rate is a measure of pitch change over time. In essence, the pitch rate provides a measure of pitch curve smoothness (a lower value corresponds to a smoother curve).                                                                                                                                                                                                                                                                                                                                                                                                                                                                    | The pitch rate provides a measure of how smooth or variable pitch is over time.                                                                                                                                                                            |
| Vowel Space             | <code>praat_vowtrav</code>      | Mean, Med, StD, Range, Max, 1st Quart, 3rd Quart, IQR      | The Euclidian distance travelled in vowel space. This is equivalent to distance between the two formants.                                                                                                                                                                                                                                                                                                                                                                                                                                                                                                                                          | Vowel space provides a measure of how much of the possible complex vowel space is used.                                                                                                                                                                    |
| Vowel Space Travel Rate | <code>praat_vowtrav_rate</code> | Whole, Med, IQR                                            | The Euclidian distance travelled in vowel space over a rate of time. This is equivalent to distance between two formants divided by rate of time.                                                                                                                                                                                                                                                                                                                                                                                                                                                                                                  | Vowel travel rate provides a measure of how much of the vowel space is used over time, a relative measure of acoustic "flashiness" of a signal.                                                                                                            |

(continued)

| Label                      | Stub                               | Variables                                                            | Description                                                                                         | Significance                                                                                                                                                           |
|----------------------------|------------------------------------|----------------------------------------------------------------------|-----------------------------------------------------------------------------------------------------|------------------------------------------------------------------------------------------------------------------------------------------------------------------------|
| Amplitude                  | <code>praat_intensity</code>       | Mean, Med, StD, Range, Min, Max, 1st Quart, 3rd Quart, IQR, Distance | A measure of amplitude (loudness) in decibels                                                       | Amplitude provides a measure of how loud or quiet a vocalization is and can be compared between types within speakers                                                  |
| Amplitude Space            | <code>praat_intensitytravel</code> | Mean, Med, StD, Range, Max, 1st Quart, 3rd Quart, IQR                | The distance between amplitude at each .03125/sec interval to the next.                             | Intensity space provides a dynamic measure of intensity's range over time.                                                                                             |
| Amplitude Rate             | <code>praat_intensity_rate</code>  | Whole, Med, IQR                                                      | A measure of decay in intensity curves in each recording measured as change in amplitude over time. | The intensity rate provides a measure of how loud or soft amplitude changes over time.                                                                                 |
| 1st Formant                | <code>praat_f1</code>              | Mean, Med, StD, Range, Min, Max, 1st Quart, 3rd Quart, IQR           | The frequency in Hertz of the 1st formant at each (.03125/sec) point                                | 1st formants are the 1st in a harmonic series following from the fundamental frequency and is important for a number of acoustic reasons.                              |
| Second Formant             | <code>praat_f2</code>              | Mean, Med, StD, Range, Min, Max, 1st Quart, 3rd Quart, IQR           | The frequency in Hertz of the second formant at each (.03125/sec) point                             | Second formants are the second in a harmonic series following from the fundamental frequency, and along with the 1st formant, is used by listeners to perceive vowels. |
| File duration              | <code>meta_length</code>           |                                                                      | The length of the unedited sound files                                                              |                                                                                                                                                                        |
| Concatenated file duration | <code>meta_edit_length</code>      |                                                                      | The length of the concatenated versions of the sound files                                          |                                                                                                                                                                        |

**Extended Data Table 1.** Codebook for acoustic features. Variable names are stubs; in the datasets on the project GitHub repository, suffixes are added to denote summary statistics (e.g., `mir_attack_mean`).



| Speech                       |             | Song                         |             |
|------------------------------|-------------|------------------------------|-------------|
| Acoustic feature             | Coefficient | Acoustic feature             | Coefficient |
| <b>Speech</b>                |             | <b>Song</b>                  |             |
| Pitch (Median)               | 2.506       | Vowel Travel (IQR)           | 0.602       |
| Vowel Travel Rate (Median)   | 0.725       | Intensity (Median)           | -0.359      |
| Pitch (IQR)                  | 0.543       | Roughness (Median)           | -0.307      |
| Pulse Clarity                | 0.250       | Attack Curve Slope (Median)  | -0.200      |
| Attack Curve Slope (Median)  | 0.220       | Second Formant (IQR)         | -0.141      |
| Second Formant (Median)      | 0.160       | Energy Roll-Off (85th %-ile) | -0.103      |
| Energy Roll-Off (85th %-ile) | -0.128      | Inharmonicity                | -0.088      |
| Roughness (IQR)              | -0.125      | Vowel Travel Rate (IQR)      | 0.053       |
| Inharmonicity                | -0.118      | Pitch (IQR)                  | -0.038      |
| Intensity (IQR)              | 0.091       | Peak Tempo                   | 0.034       |
| Attack Curve Slope (IQR)     | 0.086       | Second Formant (Median)      | -0.004      |

**Extended Data Table 2.** The predictive influence of each of the acoustical features in distinguishing infant-directed from adult-directed vocalizations, chosen via two LASSO models (performance and the top six features for each model are depicted in Fig. 1b). The coefficients can be interpreted in a similar fashion to a logistic regression, i.e., as changes in the predicted log-odds ratio (with positive values indicating a higher likelihood of infant-directedness).

| Comparison                     | Feature                   | Statistic | $\beta$ | $SE$  | $z$    | $p$    |
|--------------------------------|---------------------------|-----------|---------|-------|--------|--------|
| <b>ID Speech vs. AD Speech</b> |                           |           |         |       |        |        |
|                                | Intensity                 | Median    | 0.081   | 0.052 | 1.542  | 0.123  |
|                                | Acoustic Roughness        | Median    | -0.220  | 0.100 | -2.202 | 0.028  |
|                                |                           | IQR       | -0.124  | 0.071 | -1.740 | 0.082  |
|                                | Vowel Travel              | IQR       | 0.283   | 0.126 | 2.236  | 0.025  |
|                                | Pitch ( $F_0$ )           | Median    | 0.641   | 0.101 | 6.341  | <0.001 |
|                                |                           | IQR       | 0.602   | 0.128 | 4.692  | <0.001 |
|                                | Energy Roll-off (85 %ile) | Whole     | -0.261  | 0.063 | -4.129 | <0.001 |
|                                | Inharmonicity             | Whole     | -0.274  | 0.072 | -3.802 | <0.001 |
|                                | Pulse Clarity             | Whole     | 0.213   | 0.069 | 3.092  | 0.002  |
|                                | Vowel Travel Rate         | Median    | 0.514   | 0.116 | 4.412  | <0.001 |
|                                |                           | IQR       | 0.519   | 0.123 | 4.234  | <0.001 |
| <b>ID Song vs. AD Song</b>     |                           |           |         |       |        |        |
|                                | Intensity                 | Median    | -0.138  | 0.048 | -2.905 | 0.004  |
|                                | Acoustic Roughness        | Median    | -0.227  | 0.097 | -2.349 | 0.019  |
|                                |                           | IQR       | -0.190  | 0.083 | -2.295 | 0.022  |
|                                | Vowel Travel              | IQR       | 0.257   | 0.080 | 3.203  | 0.001  |
|                                | Pitch ( $F_0$ )           | Median    | -0.052  | 0.062 | -0.836 | 0.403  |
|                                |                           | IQR       | -0.191  | 0.079 | -2.414 | 0.016  |
|                                | Energy Roll-off (85 %ile) | Whole     | -0.025  | 0.074 | -0.330 | 0.742  |
|                                | Inharmonicity             | Whole     | -0.169  | 0.088 | -1.923 | 0.055  |
|                                | Pulse Clarity             | Whole     | 0.064   | 0.111 | 0.579  | 0.562  |
|                                | Vowel Travel Rate         | Median    | 0.179   | 0.094 | 1.896  | 0.058  |
|                                |                           | IQR       | 0.211   | 0.088 | 2.396  | 0.017  |

**Extended Data Table 3.** Regression results from confirmatory analyses (corresponding with the boxplots in Fig. 2). The features tested here were limited to those with significant differences in the exploratory analyses. Statistics are from post-hoc linear combinations following multi-level mixed-effects models. Abbreviations: infant-directed (ID); adult-directed (AD).

| Acoustic Features            | Societies     |        |         |       |              |        |              |           |                  |                    |           |       |         |                 |        |         |         |       |           |                   |            |  |
|------------------------------|---------------|--------|---------|-------|--------------|--------|--------------|-----------|------------------|--------------------|-----------|-------|---------|-----------------|--------|---------|---------|-------|-----------|-------------------|------------|--|
|                              | Arcobolobians | Ararak | Beijing | Hadza | Jenu Kurubas | Krakow | Rural Polish | Mbendjele | Menwai Islanders | Colombian Mestizos | Nyangatom | Buga  | Quechua | Sapara & Achuar | Toposa | Toronto | Tsimane | Turku | San Diego | Tanase Vanuatuans | Wellington |  |
| <b>Speech</b>                |               |        |         |       |              |        |              |           |                  |                    |           |       |         |                 |        |         |         |       |           |                   |            |  |
| Pulse Clarity                | 0.3           | 0.3    | 0.29    | 0.18  | 0.18         | 0.12   | 0.09         | 0.3       | 0.18             | 0.35               | 0.12      | 0.27  | 0.2     | 0.25            | 0.25   | 0.17    | 0.12    | 0.13  | 0.21      | 0.3               | 0.17       |  |
| Energy Roll-Off (85th %-ile) | -0.58         | -0.03  | -0.32   | -0.23 | -0.24        | -0.33  | -0.45        | -0.18     | -0.19            | -0.29              | -0.13     | -0.17 | -0.22   | -0.39           | -0.09  | -0.23   | -0.33   | -0.23 | -0.41     | -0.22             | -0.24      |  |
| Pitch (Median)               | 0.32          | 0.42   | 0.67    | 0.47  | 1.03         | 0.65   | 0.96         | 0.65      | 0.14             | 0.59               | 0.64      | 0.83  | 0.14    | 0.09            | 0.63   | 1.43    | 0.06    | 0.77  | 1.14      | 0.49              | 1.34       |  |
| Inharmonicity                | -0.31         | -0.14  | -0.34   | -0.37 | 0            | -0.29  | -0.33        | -0.18     | -0.28            | -0.41              | -0.37     | -0.15 | -0.27   | -0.14           | -0.32  | -0.43   | 0.02    | -0.38 | -0.26     | -0.33             | -0.16      |  |
| Pitch (IQR)                  | 0.22          | 0.67   | 0.53    | 0.23  | 0.78         | 0.87   | 1.11         | 0.33      | 0.06             | 0.52               | 0.23      | 0.67  | 0.26    | 0.21            | 0.17   | 1.82    | 0.07    | 0.8   | 1.15      | 0.33              | 1.17       |  |
| Vowel Travel Rate (Median)   | 0.44          | 0.15   | 0.07    | 0.84  | 0.89         | 0.66   | 0.89         | -0.01     | 0.36             | 0.04               | 0.55      | -0.31 | 0.33    | 0.58            | 0.1    | 1.4     | 0.36    | 0.77  | 1.12      | 0.35              | 1.2        |  |
| Vowel Travel Rate (IQR)      | 0.22          | 0.11   | 0.14    | 0.91  | 1.04         | 0.77   | 0.89         | 0         | 0.2              | -0.14              | 0.6       | -0.15 | 0.24    | 0.5             | 0.12   | 1.39    | 0.4     | 0.88  | 1.15      | 0.39              | 1.24       |  |
| Vowel Travel (IQR)           | 0.04          | 0.17   | -0.2    | 0.33  | 0.37         | 0.43   | 0.74         | -0.59     | 0.29             | 0.07               | 0.44      | -0.03 | -0.64   | 0.82            | -0.42  | 1.01    | 0.26    | 0.8   | 0.83      | 0.32              | 0.95       |  |
| Intensity (Median)           | 0.21          | -0.06  | 0.11    | 0.27  | 0.4          | -0.33  | -0.09        | 0.27      | 0.11             | 0.13               | 0.13      | 0.15  | 0.2     | 0.25            | 0.13   | -0.02   | 0.05    | -0.15 | -0.01     | 0.19              | -0.27      |  |
| Roughness (Median)           | 0.06          | -0.56  | -0.19   | 0.09  | 0.14         | -1.19  | -1.07        | 0.25      | -0.06            | 0.09               | -0.12     | 0.02  | 0.16    | -0.01           | -0.16  | -0.28   | 0.04    | -0.63 | -0.57     | -0.03             | -0.61      |  |
| Roughness (IQR)              | 0.1           | -0.29  | -0.17   | 0.11  | 0.17         | -0.84  | -0.46        | 0.15      | -0.16            | 0.13               | -0.23     | 0.02  | 0.09    | 0.15            | -0.17  | -0.12   | -0.03   | -0.35 | -0.29     | 0.07              | -0.5       |  |
| <b>Song</b>                  |               |        |         |       |              |        |              |           |                  |                    |           |       |         |                 |        |         |         |       |           |                   |            |  |
| Intensity (Median)           | -0.02         | -0.23  | -0.15   | -0.01 | 0.1          | -0.42  | -0.31        | -0.04     | -0.09            | -0.01              | -0.21     | -0.13 | -0.02   | 0.11            | -0.22  | -0.1    | -0.17   | -0.22 | -0.24     | -0.04             | -0.48      |  |
| Vowel Travel (IQR)           | 0.19          | 0.29   | 0.18    | -0.04 | 0.08         | 0.35   | 0.43         | 0.2       | -0.06            | 0.22               | 0.08      | 0.21  | -0.17   | 0.59            | 0.22   | 0.68    | 0.28    | 0.42  | 0.65      | 0.03              | 0.58       |  |
| Vowel Travel Rate (IQR)      | 0.31          | 0.12   | 0.08    | 0.15  | -0.03        | 0.37   | 0.43         | 1.18      | -0.07            | 0.03               | -0.18     | 0.41  | 0.15    | 0.16            | 0.17   | 0.34    | 0.14    | 0.14  | 0.24      | -0.05             | 0.36       |  |
| Roughness (IQR)              | -0.08         | -0.17  | 0.05    | 0     | 0.12         | -1.07  | -0.74        | -0.03     | -0.3             | -0.03              | -0.13     | -0.18 | 0.08    | 0.29            | -0.21  | -0.21   | 0.08    | -0.38 | -0.41     | -0.05             | -0.6       |  |
| Pitch (IQR)                  | -0.3          | -0.14  | -0.15   | -0.29 | 0.02         | -0.08  | 0.02         | -0.4      | -0.42            | -0.14              | -0.53     | -0.14 | -0.33   | -0.36           | -0.63  | 0.34    | -0.41   | -0.15 | 0.35      | -0.31             | 0.12       |  |
| Inharmonicity                | -0.11         | -0.16  | -0.34   | 0.01  | -0.31        | -0.31  | -0.22        | -0.36     | -0.23            | 0.25               | 0.16      | -0.32 | 0.08    | -0.38           | -0.15  | -0.1    | -0.63   | -0.29 | -0.44     | -0.1              | 0.09       |  |
| Vowel Travel Rate (Median)   | 0.08          | -0.04  | 0.16    | 0.2   | 0            | 0.35   | 0.37         | 1.28      | -0.08            | -0.15              | -0.32     | 0.55  | 0.08    | 0.07            | 0.09   | 0.37    | 0.16    | 0.11  | 0.22      | -0.02             | 0.31       |  |
| Roughness (Median)           | -0.06         | -0.39  | 0.04    | -0.06 | 0.08         | -1.16  | -1.15        | 0.04      | -0.17            | -0.04              | 0.02      | -0.13 | 0.17    | 0.17            | -0.17  | -0.36   | 0.15    | -0.34 | -0.56     | -0.09             | -0.56      |  |
| Pulse Clarity                | 0.21          | 0.05   | 0.39    | -0.14 | 0.09         | -0.32  | -0.35        | 0.34      | -0.27            | 0.64               | -0.23     | 0.44  | -0.01   | 0.26            | 0.27   | -0.02   | -0.32   | -0.37 | 0.1       | 0.48              | 0.12       |  |
| Pitch (Median)               | -0.29         | 0.03   | -0.05   | -0.01 | 0.06         | 0.08   | 0.15         | -0.14     | -0.11            | -0.14              | -0.36     | -0.17 | -0.21   | 0.2             | -0.26  | 0.2     | -0.09   | 0.02  | 0.22      | -0.24             | 0.01       |  |
| Energy Roll-Off (85th %-ile) | -0.49         | 0.22   | -0.14   | 0.13  | 0.01         | -0.16  | -0.33        | 0.09      | 0.1              | -0.11              | 0.18      | 0.18  | -0.08   | -0.19           | 0.26   | 0.03    | -0.02   | 0.03  | -0.22     | 0.04              | -0.02      |  |

**Extended Data Table 4** Estimated differences between infant-directed and adult-directed vocalizations, for acoustic features, in each field site (corresponding with the doughnut plots in Fig. 2). The estimates are derived from the random-effect components of the mixed-effects model reported in the Main Text. Cells of the table are shaded to facilitate the visibility of corpus-wide consistency (or inconsistency): redder cells represent features where infant-directed vocalizations have higher estimates than adult-directed vocalizations and bluer cells represent features with the reverse pattern. Within speech and song, acoustic features are ordered by their degree of cross-cultural regularity; some features showed the same direction of effect in all 21 societies (e.g., for speech, median pitch and pitch variability), whereas others were more variable.

| Song type                   | Number of songs |
|-----------------------------|-----------------|
| Love Song                   | 21              |
| Caring song                 | 3               |
| Sad Song                    | 3               |
| Ballad                      | 2               |
| Hanging out before bed song | 1               |
| Lullaby                     | 1               |
| Orphan song                 | 1               |
| Past remembrance song       | 1               |
| Religious ballad            | 1               |
| Song about island home      | 1               |

**Extended Data Table 5.**

Adult-directed songs with descriptions rated as “soothing” by two independent annotators. A mixed-effects model estimating the difference in perceived infant-directedness across these vs. other adult-directed songs, adjusting for fieldsite-wise variability, found no statistically significant difference in responses ( $b = -0.011, p = .13$ ).

| Fieldsite          | Speech |                |     | Song  |                |     |
|--------------------|--------|----------------|-----|-------|----------------|-----|
|                    | $d'$   | 95% CI         | $n$ | $d'$  | 95% CI         | $n$ |
| Afrocolombians     | 1.566  | [ 0.923 2.210] | 4   | 0.745 | [ 0.424 1.066] | 9   |
| Arawak             | 1.742  | [ 0.956 2.528] | 1   | 0.736 | [ 0.369 1.103] | 6   |
| Beijing            | 1.614  | [ 0.966 2.262] | 26  | 0.701 | [ 0.371 1.032] | 28  |
| Hadza              | 1.146  | [ 0.512 1.779] | 10  | 0.438 | [ 0.107 0.769] | 9   |
| Jenu Kurubas       | 1.289  | [ 0.614 1.965] | 10  | 0.512 | [ 0.167 0.857] | 11  |
| Krakov             | 1.308  | [ 0.610 2.005] | 7   | 0.526 | [ 0.170 0.882] | 7   |
| Rural Poland       | 1.271  | [ 0.590 1.951] | 10  | 0.575 | [ 0.222 0.927] | 7   |
| Mbendjele          | 0.897  | [ 0.185 1.608] | 3   | 0.419 | [ 0.075 0.763] | 10  |
| Mentawai Islanders | 0.520  | [-0.181 1.220] | 6   | 0.138 | [-0.208 0.485] | 13  |
| Colombian mestizos | 1.318  | [ 0.691 1.945] | 5   | 0.602 | [ 0.280 0.925] | 7   |
| Nyangatom          | 1.092  | [ 0.414 1.770] | 5   | 0.453 | [ 0.109 0.796] | 7   |
| Enga               | 0.916  | [ 0.088 1.744] | 2   | NA    | NA             | 0   |
| Quechuan/Aymaran   | 0.955  | [ 0.275 1.634] | 3   | 0.351 | [ 0.012 0.689] | 6   |
| Sápara/Achuar      | 0.477  | [-0.094 1.048] | 10  | 0.260 | [-0.042 0.562] | 11  |
| Toposa             | 1.156  | [ 0.509 1.803] | 8   | 0.520 | [ 0.181 0.859] | 6   |
| Toronto            | 1.598  | [ 0.862 2.335] | 27  | 0.749 | [ 0.378 1.120] | 23  |
| Tsimane            | 0.640  | [ 0.075 1.205] | 11  | 0.231 | [-0.068 0.531] | 12  |
| Turku              | 1.494  | [ 0.829 2.159] | 16  | 0.531 | [ 0.189 0.873] | 14  |
| San Diego          | 1.410  | [ 0.661 2.160] | 13  | 0.611 | [ 0.237 0.985] | 17  |
| Tannese Vanuatans  | 0.144  | [-0.645 0.933] | 2   | 0.069 | [-0.304 0.441] | 10  |
| Wellington         | 2.420  | [ 1.730 3.109] | 20  | 1.065 | [ 0.718 1.412] | 26  |

**Extended Data Table 6.** Estimated fieldsite-wise  $d'$ -prime values, quantifying sensitivity to infant-directedness in speech and song, independent of response bias. Values are estimated as coefficients from mixed-effects model predicting  $d'$  from vocalization type, with random effects of fieldsite for each vocalization type.  $n$  refers to the number of vocalists that had a complete pair of vocalizations in the listener experiment (e.g., where one or both of the infant- and adult-directed vocalizations were not excluded due to confounds). Due to the strict exclusion procedure (see Methods), some fieldsites have very small samples, complicating the interpretation of these results, and one fieldsite had no observations for song. These exclusions only apply to the naïve listener experiment, however, and not the acoustic analyses reported elsewhere in this paper.

| Characteristic                            | %     | N     |
|-------------------------------------------|-------|-------|
| <b>Gender</b>                             |       |       |
| Female                                    | 45.6% | 7352  |
| Male                                      | 51.5% | 8299  |
| Other                                     | 2.9%  | 463   |
| [participant did not report]              |       | 14    |
| <b>Ethnicity</b>                          |       |       |
| American Indian/Alaska Native             | 1.4%  | 207   |
| Asian                                     | 23.3% | 3366  |
| Black or African-American                 | 3.7%  | 536   |
| More than one race                        | 9.4%  | 1351  |
| Native Hawaiian or other Pacific Islander | 0.9%  | 131   |
| White                                     | 61.2% | 8836  |
| [participant did not report]              |       | 1701  |
| <b>Hispanic</b>                           |       |       |
| No                                        | 87.6% | 12712 |
| Yes                                       | 12.4% | 1804  |
| [participant did not report]              |       | 1612  |
| <b>Annual household income</b>            |       |       |
| Under \$10,000                            | 9.1%  | 912   |
| \$10,000 to \$19,999                      | 8.8%  | 879   |
| \$20,000 to \$29,999                      | 7.4%  | 747   |
| \$30,000 to \$39,999                      | 7.5%  | 755   |
| \$40,000 to \$49,999                      | 7.4%  | 747   |
| \$50,000 to \$74,999                      | 14.7% | 1471  |
| \$75,000 to \$99,999                      | 12.2% | 1227  |
| \$100,000 to \$150,000                    | 17.9% | 1795  |
| Over \$150,000                            | 15.0% | 1503  |
| [participant did not report]              |       | 6092  |

**Extended Data Table 7.**

Demographics of United States participants. See notes and corresponding analyses in SI Text 1.4.

| Principal Component 1                |           | Principal Component 2            |           | Principal Component 3                    |           |
|--------------------------------------|-----------|----------------------------------|-----------|------------------------------------------|-----------|
| Feature                              | Weighting | Feature                          | Weighting | Feature                                  | Weighting |
| Amplitude Space (Mean)               | -0.201    | Amplitude (Mean)                 | 0.269     | Pitch (Mean)                             | -0.309    |
| Amplitude Space Travel Rate (Median) | -0.200    | Amplitude (Median)               | 0.264     | Pitch (3rd Quartile)                     | -0.304    |
| Pitch Space_rate (IQR)               | -0.199    | Amplitude (3rd Quartile)         | 0.261     | Pitch (Median)                           | -0.295    |
| Pitch Space Travel Rate (Whole)      | -0.198    | Amplitude (1st Quartile)         | 0.241     | Pitch (1st Quartile)                     | -0.252    |
| Amplitude Space Travel Rate (IQR)    | -0.195    | Roughness (3rd Quartile)         | 0.215     | Pitch (IQR)                              | -0.222    |
| Amplitude Space (Median)             | -0.188    | Roughness (IQR)                  | 0.214     | Roughness (1st Quartile)                 | 0.213     |
| Amplitude Space Travel Rate (Whole)  | -0.188    | Roughness (Standard Deviation)   | 0.200     | Roughness (Median)                       | 0.192     |
| Pitch Space (3rd Quartile)           | -0.187    | Roughness (Median)               | 0.191     | Pitch (Standard Deviation)               | -0.174    |
| Pitch Space (IQR)                    | -0.186    | Amplitude (Maximum)              | 0.183     | Roughness (3rd Quartile)                 | 0.151     |
| Amplitude Space (1st Quartile)       | -0.186    | Roughness (Range)                | 0.169     | Roughness (IQR)                          | 0.146     |
| Amplitude Space (3rd Quartile)       | -0.185    | Roughness (Maximum)              | 0.169     | Roughness (Mean)                         | 0.143     |
| Vowel Space Travel Rate (Median)     | -0.185    | Amplitude (Minimum)              | 0.168     | Amplitude Space (Range)                  | -0.143    |
| Pitch Space (Mean)                   | -0.181    | Roughness (Mean)                 | 0.155     | Amplitude Space (Maximum)                | -0.143    |
| Vowel Space Travel Rate (IQR)        | -0.180    | 1st Formant (1st Quartile)       | 0.150     | Pitch Space (1st Quartile)               | -0.130    |
| Amplitude Space (IQR)                | -0.179    | Roughness (1st Quartile)         | 0.136     | Amplitude (3rd Quartile)                 | -0.127    |
| Vowel Space Travel Rate (Whole)      | -0.178    | 1st Formant (Standard Deviation) | -0.133    | Pitch (Maximum)                          | -0.123    |
| Pitch Space_rate (Median)            | -0.177    | Amplitude Space (Maximum)        | 0.132     | Amplitude (Mean)                         | -0.122    |
| Vowel Space (Mean)                   | -0.170    | Amplitude Space (Range)          | 0.132     | Amplitude (Median)                       | -0.121    |
| Amplitude Space (Standard Deviation) | -0.161    | Vowel Space (IQR)                | -0.129    | 85th Energy Percentile                   | 0.120     |
| Vowel Space (Median)                 | -0.161    | Second Formant (Mean)            | -0.126    | Second Formant (Minimum)                 | 0.114     |
| Vowel Space (Standard Deviation)     | -0.159    | Vowel Space (3rd Quartile)       | -0.126    | Amplitude (Maximum)                      | -0.109    |
| Vowel Space (1st Quartile)           | -0.159    | 1st Formant (Minimum)            | 0.125     | Amplitude (1st Quartile)                 | -0.109    |
| Vowel Space (3rd Quartile)           | -0.151    | Second Formant (3rd Quartile)    | -0.124    | Second Formant (IQR)                     | -0.109    |
| Pitch Space (Standard Deviation)     | -0.151    | 1st Formant (Range)              | -0.123    | Inharmonicity                            | 0.108     |
| Pitch Space (Median)                 | -0.151    | Second Formant (Median)          | -0.120    | Pitch Space (Maximum)                    | -0.106    |
| Vowel Space (IQR)                    | -0.143    | Second Formant (Maximum)         | -0.119    | Pitch Space (Range)                      | -0.106    |
| Amplitude (IQR)                      | -0.126    | Second Formant (Range)           | -0.117    | Amplitude (Range)                        | -0.105    |
| Temporal Modulation (Peak)           | -0.107    | 1st Formant (Median)             | 0.114     | 1st Formant (Mean)                       | 0.103     |
| nPVI Recording                       | 0.100     | Vowel Space (Mean)               | -0.111    | Temporal Modulation (Standard Deviation) | -0.103    |
| Amplitude (Standard Deviation)       | -0.098    | 1st Formant (Maximum)            | -0.108    | Second Formant (Standard Deviation)      | -0.102    |

**Extended Data Table 8.** Factor loadings for the top three principal components reported in Extended Data Fig. 3.

## 643 References

- 644 1. Morton, E. S. [On the occurrence and significance of motivation-structural rules in some bird and](#)  
645 [mammal sounds](#). *The American Naturalist* **111**, 855–869 (1977).
- 646 2. Endler, J. A. [Some general comments on the evolution and design of animal communication systems](#).  
647 *Philosophical Transactions of the Royal Society B: Biological Sciences* **340**, 215–225 (1993).
- 648 3. Owren, M. J. & Rendall, D. [Sound on the rebound: Bringing form and function back to the forefront](#)  
649 [in understanding nonhuman primate vocal signaling](#). *Evolutionary Anthropology* **10**, 58–71 (2001).
- 650 4. Fitch, W. T., Neubauer, J. & Herzog, H. [Calls out of chaos: The adaptive significance of nonlinear](#)  
651 [phenomena in mammalian vocal production](#). *Animal Behaviour* **63**, 407–418 (2002).
- 652 5. Wiley, R. H. [The evolution of communication: Information and manipulation](#). *Animal Behaviour* **2**,  
653 156–189 (1983).
- 654 6. Krebs, J. & Dawkins, R. Animal signals: Mind-reading and manipulation. in *Behavioural Ecology: An*  
655 *Evolutionary Approach* (eds. Krebs, J. & Davies, N.) 380–402 (Blackwell, 1984).
- 656 7. Karp, D., Manser, M. B., Wiley, E. M. & Townsend, S. W. [Nonlinearities in meerkat alarm calls](#)  
657 [prevent receivers from habituating](#). *Ethology* **120**, 189–196 (2014).
- 658 8. Slaughter, E. I., Berlin, E. R., Bower, J. T. & Blumstein, D. T. [A test of the nonlinearity hypothesis](#)  
659 [in great-tailed grackles \(\*Quiscalus mexicanus\*\)](#). *Ethology* **119**, 309–315 (2013).
- 660 9. Wagner, W. E. [Fighting, assessment, and frequency alteration in Blanchard’s cricket frog](#). *Behavioral*  
661 *Ecology and Sociobiology* **25**, 429–436 (1989).
- 662 10. Ladich, F. [Sound production by the river bullhead, \*Cottus gobio\* L. \(Cottidae, Teleostei\)](#). *Journal of*  
663 *Fish Biology* **35**, 531–538 (1989).
- 664 11. Filippi, P. *et al.* [Humans recognize emotional arousal in vocalizations across all classes of terrestrial](#)  
665 [vertebrates: Evidence for acoustic universals](#). *Proceedings of the Royal Society B: Biological Sciences*  
666 **284**, (2017).
- 667 12. Lingle, S. & Riede, T. [Deer mothers are sensitive to infant distress vocalizations of diverse mammalian](#)  
668 [species](#). *The American Naturalist* **184**, 510–522 (2014).
- 669 13. Custance, D. & Mayer, J. [Empathic-like responding by domestic dogs \(\*Canis familiaris\*\) to distress in](#)  
670 [humans: An exploratory study](#). *Animal Cognition* **15**, 851–859 (2012).
- 671 14. Magrath, R. D., Haff, T. M., McLachlan, J. R. & Iqic, B. [Wild birds learn to eavesdrop on heterospecific](#)  
672 [alarm calls](#). *Current Biology* **25**, 2047–2050 (2015).
- 673 15. Lea, A. J., Barrera, J. P., Tom, L. M. & Blumstein, D. T. [Heterospecific eavesdropping in a nonsocial](#)  
674 [species](#). *Behavioral Ecology* **19**, 1041–1046 (2008).
- 675 16. Piantadosi, S. T. & Kidd, C. [Extraordinary intelligence and the care of infants](#). *Proceedings of the*  
676 *National Academy of Sciences* **113**, 6874–6879 (2016).
- 677 17. Soltis, J. [The signal functions of early infant crying](#). *Behavioral and Brain Sciences* **27**, 443–458  
678 (2004).
- 679 18. Fernald, A. [Human maternal vocalizations to infants as biologically relevant signals: An evolutionary](#)  
680 [perspective](#). in *The adapted mind: Evolutionary psychology and the generation of culture* (eds. Barkow,  
681 J. H., Cosmides, L. & Tooby, J.) 391–428 (Oxford University Press, 1992).
- 682 19. Burnham, E., Gamache, J. L., Bergeson, T. & Dille, L. Voice-onset time in infant-directed speech  
683 over the first year and a half. in **19**, 060094 (ASA, 2013).
- 684 20. Fernald, A. & Mazzie, C. Prosody and focus in speech to infants and adults. *Developmental Psychology*  
685 **27**, 209–221 (1991).
- 686 21. Ferguson, C. A. [Baby talk in six languages](#). *American Anthropologist* **66**, 103–114 (1964).
- 687 22. Audibert, N. & Falk, S. Vowel space and f0 characteristics of infant-directed singing and speech. in  
688 *Proceedings of the 19th international conference on speech prosody* 153–157 (2018).



- 688 23. Kuhl, P. K. *et al.* Cross-language analysis of phonetic units in language addressed to infants. *Science*  
689 **277**, 684–686 (1997).
- 690 24. Englund, K. T. & Behne, D. M. Infant directed speech in natural interaction: Norwegian vowel  
691 quantity and quality. *Journal of Psycholinguistic Research* **34**, 259–280 (2005).
- 692 25. Fernald, A. The perceptual and affective salience of mothers' speech to infants. in *The origins and*  
693 *growth of communication* (1984).
- 694 26. Falk, S. & Kello, C. T. Hierarchical organization in the temporal structure of infant-direct speech and  
695 song. *Cognition* **163**, 80–86 (2017).
- 696 27. Bryant, G. A. & Barrett, H. C. [Recognizing intentions in infant-directed speech: Evidence for universals.](#)  
697 *Psychological Science* **18**, 746–751 (2007).
- 698 28. Piazza, E. A., Jordan, M. C. & Lew-Williams, C. [Mothers consistently alter their unique vocal](#)  
699 [fingerprints when communicating with infants.](#) *Current Biology* **27**, 3162–3167 (2017).
- 700 29. Trehub, S. E., Unyk, A. M. & Trainor, L. J. [Adults identify infant-directed music across cultures.](#)  
701 *Infant Behavior and Development* **16**, 193–211 (1993).
- 702 30. Trehub, S. E., Unyk, A. M. & Trainor, L. J. [Maternal singing in cross-cultural perspective.](#) *Infant*  
703 *Behavior and Development* **16**, 285–295 (1993).
- 704 31. Mehr, S. A., Singh, M., York, H., Glowacki, L. & Krasnow, M. M. [Form and function in human song.](#)  
705 *Current Biology* **28**, 356–368 (2018).
- 706 32. Mehr, S. A. *et al.* [Universality and diversity in human song.](#) *Science* **366**, 957–970 (2019).  
707
- 708 33. Trehub, S. E. [Musical predispositions in infancy.](#) *Annals of the New York Academy of Sciences* **930**,  
709 1–16 (2001).
- 710 34. Trehub, S. E. & Trainor, L. [Singing to infants: Lullabies and play songs.](#) *Advances in Infancy Research*  
711 **12**, 43–78 (1998).
- 712 35. Trehub, S. E. *et al.* Mothers' and fathers' singing to infants. *Developmental Psychology* **33**, 500–507  
713 (1997).
- 714 36. Thiessen, E. D., Hill, E. A. & Saffran, J. R. Infant-directed speech facilitates word segmentation.  
715 *Infancy* **7**, 53–71 (2005).
- 716 37. Trainor, L. J. & Desjardins, R. N. [Pitch characteristics of infant-directed speech affect infants' ability](#)  
717 [to discriminate vowels.](#) *Psychonomic Bulletin & Review* **9**, 335–340 (2002).
- 718 38. Werker, J. F. & McLeod, P. J. [Infant preference for both male and female infant-directed talk: A](#)  
719 [developmental study of attentional and affective responsiveness.](#) *Canadian Journal of Psychology/Revue*  
*Canadienne de Psychologie* **43**, 230–246 (1989).
- 720 39. Ma, W., Fiveash, A., Margulis, E. H., Behrend, D. & Thompson, W. F. [Song and infant-directed](#)  
721 [speech facilitate word learning.](#) *Quarterly Journal of Experimental Psychology* **73**, 1036–1054 (2020).
- 722 40. Falk, D. [Prelinguistic evolution in early hominins: Whence motherese?](#) *Behavioral and Brain Sciences*  
723 **27**, 491–502 (2004).
- 724 41. Mehr, S. A. & Krasnow, M. M. [Parent-offspring conflict and the evolution of infant-directed song.](#)  
725 *Evolution and Human Behavior* **38**, 674–684 (2017).
- 726 42. Mehr, S. A., Kotler, J., Howard, R. M., Haig, D. & Krasnow, M. M. [Genomic imprinting is implicated](#)  
727 [in the psychology of music.](#) *Psychological Science* **28**, 1455–1467 (2017).
- 728 43. Kotler, J., Mehr, S. A., Egner, A., Haig, D. & Krasnow, M. M. [Response to vocal music in Angelman](#)  
729 [syndrome contrasts with Prader-Willi syndrome.](#) *Evolution and Human Behavior* **40**, 420–426 (2019).
- 730 44. Cirelli, L. K., Jurewicz, Z. B. & Trehub, S. E. Effects of maternal singing style on mother–infant  
731 arousal and behavior. *Journal of Cognitive Neuroscience* (2019). doi:10.1162/jocn\_a\_01402
- 732 45. Cirelli, L. K. & Trehub, S. E. Familiar songs reduce infant distress. *Developmental Psychology* (2020).  
733 doi:10.1037/dev0000917

- 734 46. Mehr, S. A., Krasnow, M. M., Bryant, G. A. & Hagen, E. H. Origins of music in credible signaling.  
735 *Behavioral and Brain Sciences* 1–41 (2020). doi:[10.1017/S0140525X20000345](https://doi.org/10.1017/S0140525X20000345)
- 736 47. Senju, A. & Csibra, G. [Gaze Following in Human Infants Depends on Communicative Signals](#). *Current*  
737 *Biology* **18**, 668–671 (2008).
- 738 48. Hernik, M. & Broesch, T. [Infant gaze following depends on communicative signals: An eye-tracking](#)  
739 [study of 5- to 7-month-olds in Vanuatu](#). *Developmental Science* **22**, e12779 (2019).
- 740 49. Grieser, D. L. & Kuhl, P. K. Maternal speech to infants in a tonal language: Support for universal  
741 prosodic features in motherese. *Developmental Psychology* **24**, 14 (1988).
- 742 50. Fisher, C. & Tokura, H. Acoustic cues to grammatical structure in infant-directed speech: Cross-  
743 linguistic evidence. *Child Development* **67**, 3192–3218 (1996).
- 744 51. Broesch, T. L. & Bryant, G. A. [Prosody in Infant-Directed Speech Is Similar Across Western and](#)  
745 [Traditional Cultures](#). *Journal of Cognition and Development* **16**, 31–43 (2015).
- 746 52. Farran, L. K., Lee, C.-C., Yoo, H. & Oller, D. K. [Cross-Cultural Register Differences in Infant-Directed](#)  
747 [Speech: An Initial Study](#). *PLOS ONE* **11**, e0151518 (2016).
- 748 53. Henrich, J., Heine, S. J. & Norenzayan, A. [The weirdest people in the world?](#) *Behavioral and Brain*  
749 *Sciences* **33**, 61–83 (2010).
- 750 54. Yarkoni, T. [The generalizability crisis](#). *Behavioral and Brain Sciences* **45**, e1 (2022).
- 751
- 752 55. Broesch, T. & Bryant, G. A. [Fathers' Infant-Directed Speech in a Small-Scale Society](#). *Child Develop-*  
753 *ment* **89**, e29–e41 (2018).
- 754 56. Ochs, E. & Schieffelin, B. Language acquisition and socialization. *Culture theory: Essays on mind,*  
755 *self, and emotion* 276–320 (1984).
- 756 57. Ratner, N. B. [Phonological rule usage in mother-child speech](#). *Journal of Phonetics* **12**, 245–254  
757 (1984).
- 758 58. Schieffelin, B. B. *The give and take of everyday life: Language, socialization of Kaluli children*. (CUP  
759 Archive, 1990).
- 760 59. Ratner, N. B. & Pye, C. Higher pitch in BT is not universal: Acoustic evidence from Quiche Mayan.  
761 *Journal of child language* **11**, 515–522 (1984).
- 762 60. Pye, C. Quiché mayan speech to children. *Journal of child language* **13**, 85–100 (1986).
- 763
- 764 61. Heath, S. B. *Ways with words: Language, life and work in communities and classrooms*. (Cambridge  
765 university Press, 1983).
- 766 62. Trehub, S. E. Challenging infant-directed singing as a credible signal of maternal attention. *Behavioral*  
767 *and Brain Sciences* (2021).
- 768 63. Räsänen, O., Kakouros, S. & Soderstrom, M. [Is infant-directed speech interesting because it is](#)  
769 [surprising? – Linking properties of IDS to statistical learning and attention at the prosodic level](#).  
*Cognition* **178**, 193–206 (2018).
- 770 64. Cristia, A. & Seidl, A. [The hyperarticulation hypothesis of infant-directed speech](#). *Journal of child*  
771 *language* **41**, 913–934 (2014).
- 772 65. Kalashnikova, M., Carignan, C. & Burnham, D. [The origins of babytalk: Smiling, teaching or social](#)  
773 [convergence?](#) *Royal Society Open Science* **4**, 170306 (2017).
- 774 66. Kitamura, C., Thanavishuth, C., Burnham, D. & Luksaneeyanawin, S. Universality and specificity in  
775 infant-directed speech: Pitch modifications as a function of infant age and sex in a tonal and non-tonal  
776 language. *Infant Behavior and Development* **24**, 372–392 (2001).
- 777 67. Fernald, A. [Intonation and communicative intent in mothers' speech to infants: Is the melody the](#)  
[message?](#) *Child Development* **60**, 1497–1510 (1989).

- 778 68. Broesch, T., Rochat, P., Olah, K., Broesch, J. & Henrich, J. [Similarities and Differences in Maternal Responsiveness in Three Societies: Evidence From Fiji, Kenya, and the United States](#). *Child Development* **87**, 700–711 (2016).
- 779
- 780 69. ManyBabies Consortium. [Quantifying sources of variability in infancy research using the infant-directed-speech preference](#). *Advances in Methods and Practices in Psychological Science* **3**, 24–52 (2020).
- 781
- 782 70. Soley, G. & Sebastian-Galles, N. [Infants' expectations about the recipients of infant-directed and adult-directed speech](#). *Cognition* **198**, 104214 (2020).
- 783
- 784 71. Byers-Heinlein, K. *et al.* A Multilab Study of Bilingual Infants: Exploring the Preference for Infant-Directed Speech. *Advances in Methods and Practices in Psychological Science* **30** (2021).
- 785
- 786 72. Fernald, A. *et al.* [A cross-language study of prosodic modifications in mothers' and fathers' speech to preverbal infants](#). *Journal of Child Language* **16**, 477–501 (1989).
- 787
- 788 73. Kitamura, C. & Burnham, D. [Pitch and Communicative Intent in Mother's Speech: Adjustments for Age and Sex in the First Year](#). *Infancy* **4**, 85–110 (2003).
- 789
- 790 74. Kitamura, C. & Lam, C. [Age-Specific Preferences for Infant-Directed Affective Intent](#). *Infancy* **14**, 77–100 (2009).
- 791
- 792 75. Hilton, C., Crowley, L., Yan, R., Martin, A. & Mehr, S. [Children infer the behavioral contexts of unfamiliar foreign songs](#). (PsyArXiv, 2021). doi:10.31234/osf.io/rz6qn
- 793
- 794 76. Yan, R. *et al.* [Across demographics and recent history, most parents sing to their infants and toddlers daily](#). (PsyArXiv, 2021). doi:10.31234/osf.io/fy5bh
- 795
- 796 77. Custodero, L. A., Rebello Britto, P. & Brooks-Gunn, J. [Musical lives: A collective portrait of American parents and their young children](#). *Journal of Applied Developmental Psychology* **24**, 553–572 (2003).
- 797
- 798 78. Mendoza, J. K. & Fausey, C. M. [Everyday music in infancy](#). *Developmental Science* (2021). doi:10.31234/osf.io/sqatb
- 799
- 800 79. Konner, M. Aspects of the developmental ethology of a foraging people. in *Ethological Studies of Child Behaviour* (ed. Blurton Jones, N. G.) 285–304 (Cambridge University Press, 1972).
- 801
- 802 80. Marlowe, F. *The Hadza hunter-gatherers of Tanzania*. (University of California Press, 2010).
- 803
- 804 81. Bainbridge, C. M. *et al.* [Infants relax in response to unfamiliar foreign lullabies](#). *Nature Human Behaviour* (2021). doi:10.1038/s41562-020-00963-z
- 805
- 806 82. Friedman, J., Hastie, T. & Tibshirani, R. [Lasso and elastic-net regularized generalized linear models](#). Rpackage version 2.0-5. (2016).
- 807
- 808 83. Hagen, E. H. & Bryant, G. A. [Music and dance as a coalition signaling system](#). *Human Nature* **14**, 21–51 (2003).
- 809
- 810 84. Corbeil, M., Trehub, S. E. & Peretz, I. [Singing delays the onset of infant distress](#). *Infancy* **21**, 373–391 (2016).
- 811
- 812 85. Arnal, L. H., Flinker, A., Kleinschmidt, A., Giraud, A.-L. & Poeppel, D. [Human screams occupy a privileged niche in the communication soundscape](#). *Current Biology* **25**, 2051–2056 (2015).
- 813
- 814 86. Lumsden, C. J. & Wilson, E. O. [Translation of epigenetic rules of individual behavior into ethnographic patterns](#). *Proceedings of the National Academy of Sciences* **77**, 4382–4386 (1980).
- 815
- 816 87. Fitch, W. T. [Vocal tract length and formant frequency dispersion correlate with body size in rhesus macaques](#). *The Journal of the Acoustical Society of America* **11** (1997).
- 817
- 818 88. Blumstein, D. T., Bryant, G. A. & Kaye, P. [The sound of arousal in music is context-dependent](#). *Biology Letters* **8**, 744–747 (2012).
- 819
- 820 89. Reber, S. A. *et al.* [Formants provide honest acoustic cues to body size in American alligators](#). *Scientific Reports* **7**, 1816 (2017).
- 821
- 822 90. Reby, D. *et al.* [Red deer stags use formants as assessment cues during intrasexual agonistic interactions](#). *Proceedings of the Royal Society B: Biological Sciences* **272**, 941–947 (2005).

- 823  
824 91. Bertoncini, J., Bijeljac-Babic, R., Jusczyk, P. W., Kennedy, L. J. & Mehler, J. An investigation of  
young infants' perceptual representations of speech sounds. *Journal of Experimental Psychology:  
825 General* **117**, 21–33 (1988).
- 826 92. Werker, J. F. & Lalonde, C. E. Cross-language speech perception: Initial capabilities and developmental  
827 change. *Developmental Psychology* **24**, 672 (1988).
- 828 93. Polka, L. & Werker, J. F. [Developmental changes in perception of nonnative vowel contrasts](#). *Journal  
829 of Experimental Psychology: Human Perception and Performance* **20**, 421–435 (1994).
- 830 94. Trainor, L. J., Clark, E. D., Huntley, A. & Adams, B. A. [The acoustic basis of preferences for  
831 infant-directed singing](#). *Infant Behavior and Development* **20**, 383–396 (1997).
- 832 95. Tsang, C. D., Falk, S. & Hessel, A. [Infants prefer infant-directed song over speech](#). *Child Development*  
833 **88**, 1207–1215 (2017).
- 834 96. McDermott, J. H., Schultz, A. F., Undurraga, E. A. & Godoy, R. A. [Indifference to dissonance in  
835 native Amazonians reveals cultural variation in music perception](#). *Nature* **535**, 547–550 (2016).
- 836 97. Trehub, S. E., Hill, D. S. & Kamenetsky, S. B. Parents' sung performances for infants. *Canadian  
837 Journal of Experimental Psychology* **51**, 385–396 (1997).
- 838 98. Kirby, K. R. *et al.* [D-PLACE: A Global Database of Cultural, Linguistic and Environmental Diversity](#).  
839 *PLOS ONE* **11**, e0158391 (2016).
- 840 99. Boersma, P. W. Praat: Doing phonetics by computer. (2019).  
841
- 842 100. Lartillot, O., Toiviainen, P. & Eerola, T. A Matlab toolbox for music information retrieval. in *Data  
analysis, machine learning and applications* (eds. Preisach, C., Burkhardt, H., Schmidt-Thieme, L. &  
843 Decker, R.) 261–268 (Springer Berlin Heidelberg, 2008).
- 844 101. Patel, A. D. [Musical rhythm, linguistic rhythm, and human evolution](#). *Music Perception* **24**, 99–104  
845 (2006).
- 846 102. Mertens, P. The prosogram: Semi-automatic transcription of prosody based on a tonal perception  
847 model. in (2004).
- 848 103. Kuhn, M. & Wickham, H. Tidymodels: A collection of packages for modeling and machine learning  
849 using tidyverse principles. (2020).
- 850 104. Leeuw, J. R. de. [jsPsych: A JavaScript library for creating behavioral experiments in a Web browser](#).  
851 *Behavior Research Methods* **47**, 1–12 (2015).
- 852 105. Hartshorne, J. K., Leeuw, J. de, Goodman, N., Jennings, M. & O'Donnell, T. J. [A thousand studies  
853 for the price of one: Accelerating psychological science with Pushkin](#). *Behavior Research Methods* **51**,  
1782–1803 (2019).
- 854 106. Hilton, C. B. & Mehr, S. A. Citizen science can help to alleviate the generalizability crisis. *Behavioral  
855 and Brain Sciences* (2022).
- 856 107. Sheskin, M. *et al.* Online developmental science to foster innovation, access, and impact. *Trends in  
857 Cognitive Sciences* (2020). doi:[10.1016/j.tics.2020.06.004](https://doi.org/10.1016/j.tics.2020.06.004)
- 858 108. Anwyl-Irvine, A., Dalmaijer, E. S., Hodges, N. & Evershed, J. K. [Realistic precision and accuracy of  
online experiment platforms, web browsers, and devices](#). *Behavior Research Methods* **53**, 1407–1425  
859 (2021).
- 860 109. Buyens, W., Moonen, M., Wouters, J. & Dijk, B. van. A model for music complexity applied to music  
861 preprocessing for cochlear implants. in 971–975 (IEEE, 2017).
- 862 110. Ding, N. *et al.* [Temporal modulations in speech and music](#). *Neuroscience & Biobehavioral Reviews* **81**,  
863 (2017).
- 864 111. Yale, C. & Forsythe, A. B. [Winsorized regression](#). *Technometrics* **18**, 291–300 (1976).  
865
- 866 112. Fernald, A. & Simon, T. [Expanded intonation contours in mothers' speech to newborns](#). *Developmental  
Psychology* **20**, 104–113 (1984).
